# Supplementary material
Source: HighWire-hosted journal article supplement (https://fn.bmj.com/content/106/5/474)
Supplement: inline-supplementary-material-1 [file inline-supplementary-material-1.pdf]

## **Supplementary Appendix**

### **Contents**

|                                                                 |    |
|-----------------------------------------------------------------|----|
| Appendix 1: Search strategy .....                               | 2  |
| Appendix 2: Study characteristics .....                         | 4  |
| Appendix 3: Network plots .....                                 | 9  |
| Appendix 4: Risk of bias evaluation .....                       | 10 |
| Appendix 5: Meta-regression analysis.....                       | 12 |
| Appendix 6: Gestational age <28 weeks.....                      | 13 |
| Appendix 7: Randomized vs. non-randomized evidence .....        | 14 |
| Appendix 8: Transitivity assessment.....                        | 15 |
| Appendix 9: Inconsistency assessment.....                       | 24 |
| Appendix 10: Publication bias assessment .....                  | 25 |
| Appendix 11: Confidence In Network Meta-Analysis (CiNeMA) ..... | 28 |
| Appendix 12: PRISMA checklist .....                             | 29 |

## **Appendix 1: Search strategy**

**MEDLINE:** 802 articles

**Scopus:** 226 articles

**Web of Science:** 398 articles

**Clinicaltrials.gov:** 121 articles

**CENTRAL:** 47 articles

**Additional sources (Google Scholar/snowball method):** 6 articles

**Total:** 1,600 articles

**Duplicates:** 418 articles

**Screened:** 1,182 articles

**Retrieved in full-text:** 43 studies

**Excluded with reasons:** 7 studies

**Included in the qualitative and quantitative synthesis:** 36 studies

### Intervention:

-Thin catheter administration: 28 studies

-Laryngeal mask: 5 studies

-Nebulization: 2 studies

-InSurE: 32 studies

-Pharyngeal instillation: 1 study

-No surfactant: 5 studies

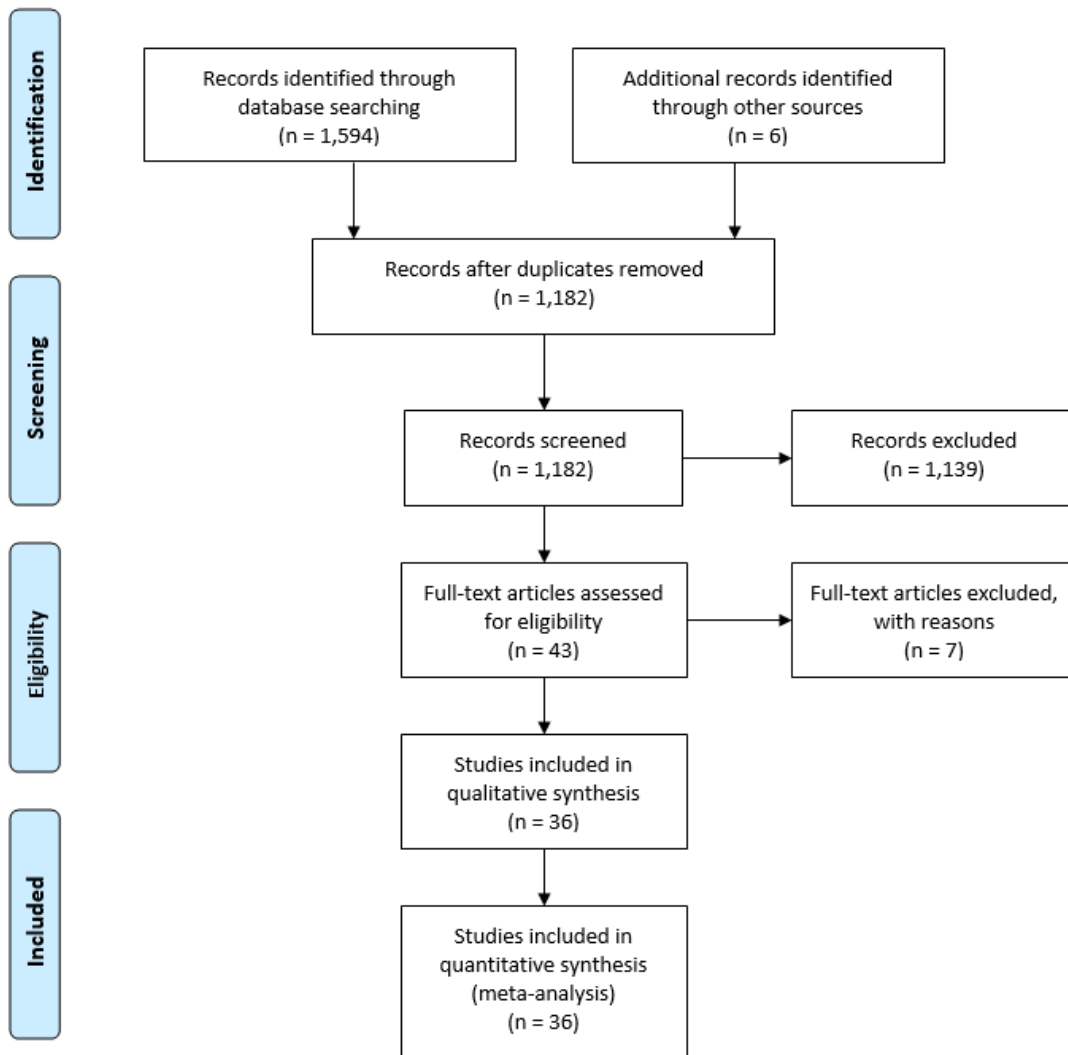

**Suppl. Figure 1.** Search plot diagram

## Appendix 2: Study characteristics

| Year; Author       | Study design | Inclusion criteria                                                                                                                       | Exclusion criteria                                                                                                                                                                                     | Method of SURE                                         | Use of forceps | Pre-medication        | Surfactant dose                   | Use of nCPAP | Comparator | Outcomes of interest                                                                                                                                                                                                                    |
|--------------------|--------------|------------------------------------------------------------------------------------------------------------------------------------------|--------------------------------------------------------------------------------------------------------------------------------------------------------------------------------------------------------|--------------------------------------------------------|----------------|-----------------------|-----------------------------------|--------------|------------|-----------------------------------------------------------------------------------------------------------------------------------------------------------------------------------------------------------------------------------------|
| 2019; Minocchieri  | RCT          | <ul style="list-style-type: none"> <li>•Gestational age: 29-34 weeks</li> <li>•RDS diagnosis</li> </ul>                                  | <ul style="list-style-type: none"> <li>•Major congenital abnormalities</li> <li>•Cardiopulmonary failure</li> <li>•History of intubation or surfactant</li> <li>•Pneumothorax at enrollment</li> </ul> | Nebulization                                           | NA             | No                    | Curosurf <sup>®</sup> , 200 mg/kg | Yes          | InSurE     | <ul style="list-style-type: none"> <li>•MV within 72h</li> <li>•BPD</li> <li>•Pneumothorax</li> <li>•IVH grade III/IV</li> </ul>                                                                                                        |
| 2019; Legge        | RC           | <ul style="list-style-type: none"> <li>•Birth weight &gt;500 g</li> <li>•Gestational age &gt;24 weeks</li> <li>•RDS diagnosis</li> </ul> | <ul style="list-style-type: none"> <li>•Major congenital abnormalities</li> </ul>                                                                                                                      | Thin catheter                                          | NR             | NR                    | NR                                | Yes          | InSurE     | <ul style="list-style-type: none"> <li>•Mortality</li> <li>•Pneumothorax</li> <li>•IVH grade &gt;II</li> <li>•NEC</li> <li>•hs-PDA</li> </ul>                                                                                           |
| 2019; Jena         | RCT          | <ul style="list-style-type: none"> <li>•Gestational age ≤34 weeks</li> <li>•RDS diagnosis</li> </ul>                                     | <ul style="list-style-type: none"> <li>•Major congenital abnormalities</li> <li>•Need of intubation for resuscitation</li> </ul>                                                                       | Thin catheter/<br>6F nasogastric tube or 16G Angiocath | No             | No                    | Neosurf <sup>®</sup> , 5 ml/kg    | Yes          | InSurE     | <ul style="list-style-type: none"> <li>•Mortality</li> <li>•MV within 72h</li> <li>•BPD</li> <li>•Pneumothorax</li> <li>•IVH grade ≥II</li> <li>•NEC stage ≥2</li> <li>•hs-PDA</li> </ul>                                               |
| 2019; Isidro       | RC           | <ul style="list-style-type: none"> <li>•Gestational age &lt;32 weeks</li> <li>•RDS diagnosis</li> </ul>                                  | <ul style="list-style-type: none"> <li>•Need of intubation for resuscitation</li> </ul>                                                                                                                | Thin catheter                                          | NR             | NR                    | Survanta <sup>®</sup> , 100 mg/kg | Yes          | InSurE     | <ul style="list-style-type: none"> <li>•Mortality</li> <li>•MV within 72h</li> <li>•NEC</li> <li>•hs-PDA</li> <li>•Repeat dose</li> </ul>                                                                                               |
| 2019; Hanke        | PC           | <ul style="list-style-type: none"> <li>•Gestational age: 26-32 weeks</li> <li>•RDS diagnosis</li> </ul>                                  | <ul style="list-style-type: none"> <li>•Major congenital abnormalities</li> <li>•Need of intubation for resuscitation</li> </ul>                                                                       | Thin catheter                                          | Yes            | No                    | Curosurf <sup>®</sup> , 100 mg/kg | Yes          | InSurE     | <ul style="list-style-type: none"> <li>•Repeat dose</li> </ul>                                                                                                                                                                          |
| 2019; Halim        | RCT          | <ul style="list-style-type: none"> <li>•Gestational age ≤34 weeks</li> <li>•RDS diagnosis</li> </ul>                                     | <ul style="list-style-type: none"> <li>•Major congenital abnormalities</li> <li>•Need of intubation for resuscitation</li> </ul>                                                                       | Thin catheter/<br>6F nasogastric tube                  | No             | No                    | Survanta <sup>®</sup> , 100 mg/kg | Yes          | InSurE     | <ul style="list-style-type: none"> <li>•Mortality</li> <li>•MV</li> <li>•Pneumothorax</li> <li>•hs-PDA</li> </ul>                                                                                                                       |
| 2019; Buyuktiryaki | RC           | <ul style="list-style-type: none"> <li>•Gestational age: 25-29 weeks</li> <li>•RDS diagnosis</li> </ul>                                  | <ul style="list-style-type: none"> <li>•Major congenital abnormalities</li> <li>•Need of intubation for resuscitation</li> </ul>                                                                       | Thin catheter/<br>5F nasogastric tube                  | No             | No                    | Curosurf <sup>®</sup> , 200 mg/kg | Yes          | InSurE     | <ul style="list-style-type: none"> <li>•Mortality</li> <li>•MV within 72h</li> <li>•BPD at 36w</li> <li>•Pneumothorax</li> <li>•IVH grade &gt;II</li> <li>•NEC stage ≥2</li> <li>•PVL</li> <li>•hs-PDA</li> <li>•Repeat dose</li> </ul> |
| 2019; Berneau      | RC           | <ul style="list-style-type: none"> <li>•Gestational age &lt;30 weeks</li> </ul>                                                          | <ul style="list-style-type: none"> <li>•Major congenital abnormalities</li> </ul>                                                                                                                      | Thin catheter/<br>4F suction catheter                  | Yes            | Atropine/<br>Ketamine | 200 mg/kg                         | Yes          | InSurE     | <ul style="list-style-type: none"> <li>•Mortality</li> <li>•MV within 72h</li> <li>•BPD at 36w</li> <li>•Pneumothorax</li> <li>•PVL</li> <li>•Repeat dose</li> </ul>                                                                    |
| 2018; Seo          | RC           | <ul style="list-style-type: none"> <li>•Gestational age &gt;30 weeks</li> <li>•RDS diagnosis</li> </ul>                                  | <ul style="list-style-type: none"> <li>•Major congenital abnormalities</li> <li>•Need of intubation for resuscitation</li> </ul>                                                                       | Thin catheter/ 4-<br>5F nasogastric tube               | Yes            | No                    | Curosurf <sup>®</sup> , 200 mg/kg | Yes          | InSurE     | <ul style="list-style-type: none"> <li>•MV</li> <li>•BPD at 36w</li> <li>•Pneumothorax</li> </ul>                                                                                                                                       |

|                     |                 |                                                                                                                                           |                                                                                                                                                                      |                                       |     |                       |                                                   |     |               |                                                                                                                                                                                                                                              |
|---------------------|-----------------|-------------------------------------------------------------------------------------------------------------------------------------------|----------------------------------------------------------------------------------------------------------------------------------------------------------------------|---------------------------------------|-----|-----------------------|---------------------------------------------------|-----|---------------|----------------------------------------------------------------------------------------------------------------------------------------------------------------------------------------------------------------------------------------------|
|                     |                 |                                                                                                                                           |                                                                                                                                                                      |                                       |     |                       |                                                   |     |               | <ul style="list-style-type: none"> <li>•IVH grade <math>\geq</math>II</li> <li>•NEC stage <math>\geq</math>2</li> <li>•hs-PDA</li> <li>•Repeat dose</li> </ul>                                                                               |
| 2018; Ramos-Navarro | PC              | <ul style="list-style-type: none"> <li>•Gestational age &lt;32 weeks</li> <li>•RDS diagnosis</li> </ul>                                   | <ul style="list-style-type: none"> <li>•No surfactant administration</li> </ul>                                                                                      | Thin catheter/<br>5F nasogastric tube | No  | No                    | Survanta <sup>®</sup> ,<br>200 mg/kg              | Yes | InSurE        | <ul style="list-style-type: none"> <li>•Repeat dose</li> </ul>                                                                                                                                                                               |
| 2018; Langhammer    | Cross-sectional | <ul style="list-style-type: none"> <li>•Birth weight &lt;1500 g</li> </ul>                                                                | <ul style="list-style-type: none"> <li>•No surfactant administration</li> </ul>                                                                                      | Thin catheter/<br>nasogastric tube    | Yes | No                    | Curosurf <sup>®</sup> or<br>Survanta <sup>®</sup> | Yes | InSurE        | <ul style="list-style-type: none"> <li>•MV</li> <li>•BPD at 36w</li> <li>•Pneumothorax</li> <li>•IVH grade &gt;II</li> <li>•PVL</li> <li>•NEC stage <math>\geq</math>2</li> <li>•hs-PDA</li> </ul>                                           |
| 2018; Hartel        | PC              | <ul style="list-style-type: none"> <li>•Birth weight &lt;1500 g</li> <li>•Gestational age: 22-29 weeks</li> </ul>                         | <ul style="list-style-type: none"> <li>•Major congenital abnormalities</li> </ul>                                                                                    | Thin catheter/<br>5F nasogastric tube | NR  | No                    | Curosurf <sup>®</sup> ,<br>100 mg/kg              | Yes | InSurE        | <ul style="list-style-type: none"> <li>•Mortality</li> <li>•BPD at 36w</li> <li>•IVH grade <math>\geq</math>II</li> <li>•NEC stage <math>\geq</math>2</li> <li>•PVL</li> <li>•hs-PDA</li> </ul>                                              |
| 2018; Dargaville    | RC              | <ul style="list-style-type: none"> <li>•Gestational age: 29-32 weeks</li> <li>•RDS diagnosis</li> </ul>                                   | <ul style="list-style-type: none"> <li>•Major congenital abnormalities</li> <li>•PPROM <math>\geq</math>14 days</li> </ul>                                           | Thin catheter                         | NR  | NR                    | Curosurf <sup>®</sup> , 100 -<br>200 mg/kg        | Yes | No surfactant | <ul style="list-style-type: none"> <li>•Mortality</li> <li>•MV</li> <li>•BPD at 36w</li> <li>•Pneumothorax</li> <li>•IVH grade &gt;II</li> </ul>                                                                                             |
| 2017; Tomar         | PC              | <ul style="list-style-type: none"> <li>•Gestational age: 24-34 weeks</li> <li>•RDS diagnosis</li> </ul>                                   | <ul style="list-style-type: none"> <li>•Major congenital abnormalities</li> <li>•Need of intubation for resuscitation</li> </ul>                                     | Thin catheter/<br>5F nasogastric tube | No  | No                    | Survanta <sup>®</sup> ,<br>100 mg/kg              | Yes | InSurE        | <ul style="list-style-type: none"> <li>•Mortality</li> <li>•BPD at 36w</li> <li>•Pneumothorax</li> <li>•IVH</li> <li>•NEC stage <math>\geq</math>2</li> <li>•PDA</li> <li>•Repeat dose</li> </ul>                                            |
| 2017; Templin       | PC              | <ul style="list-style-type: none"> <li>•Gestational age: 24-26 weeks</li> <li>•RDS diagnosis</li> </ul>                                   | <ul style="list-style-type: none"> <li>•Major congenital abnormalities</li> </ul>                                                                                    | Thin catheter/<br>5F suction catheter | Yes | No                    | Curosurf <sup>®</sup> ,<br>200 mg/kg              | Yes | InSurE        | <ul style="list-style-type: none"> <li>•Mortality</li> <li>•MV</li> <li>•BPD at 36w</li> <li>•Pneumothorax</li> <li>•IVH grade &gt;II</li> <li>•NEC stage <math>\geq</math>2</li> <li>•PVL</li> <li>•hs-PDA</li> <li>•Repeat dose</li> </ul> |
| 2017; Roberts       | RCT             | <ul style="list-style-type: none"> <li>•Gestational age: 28-36 weeks</li> <li>•Birth weight &gt;1250 g</li> <li>•RDS diagnosis</li> </ul> | <ul style="list-style-type: none"> <li>•Major congenital abnormalities</li> <li>•5-minute Apgar score &lt;5</li> <li>•History of intubation or surfactant</li> </ul> | Laryngeal mask                        | NA  | Atropine,<br>sucrose  | Curosurf <sup>®</sup> ,<br>200 mg/kg              | Yes | No surfactant | <ul style="list-style-type: none"> <li>•Mortality</li> <li>•MV</li> <li>•Pneumothorax</li> <li>•IVH grade &gt;II</li> <li>•PVL</li> <li>•Repeat dose</li> </ul>                                                                              |
| 2017; Olivier       | RCT             | <ul style="list-style-type: none"> <li>•Gestational age: 32-37 weeks</li> <li>•RDS diagnosis</li> </ul>                                   | <ul style="list-style-type: none"> <li>•Major congenital abnormalities</li> <li>•History of intubation</li> <li>•Pneumothorax at enrollment</li> </ul>               | Thin catheter/<br>5F nasogastric tube | Yes | Atropine/<br>Fentanyl | Survanta <sup>®</sup> ,<br>100 mg/kg              | Yes | InSurE        | <ul style="list-style-type: none"> <li>•MV</li> <li>•Pneumothorax</li> <li>•Repeat dose</li> </ul>                                                                                                                                           |

|                      |     |                                                                                                                                                          |                                                                                                                                                                                                                                                                      |                                       |     |          |                                      |     |        |                                                                                                                                                                                                                                     |
|----------------------|-----|----------------------------------------------------------------------------------------------------------------------------------------------------------|----------------------------------------------------------------------------------------------------------------------------------------------------------------------------------------------------------------------------------------------------------------------|---------------------------------------|-----|----------|--------------------------------------|-----|--------|-------------------------------------------------------------------------------------------------------------------------------------------------------------------------------------------------------------------------------------|
| 2017; Bertini        | PC  | <ul style="list-style-type: none"> <li>•Gestational age <math>\leq</math>33 weeks</li> <li>•RDS diagnosis</li> </ul>                                     | <ul style="list-style-type: none"> <li>•Major congenital abnormalities</li> <li>•Need of intubation for resuscitation</li> </ul>                                                                                                                                     | Thin catheter/<br>5F nasogastric tube | Yes | No       | Curosurf <sup>®</sup> ,<br>200 mg/kg | Yes | InSurE | <ul style="list-style-type: none"> <li>•Mortality</li> <li>•MV</li> <li>•BPD</li> <li>•IVH grade <math>&gt;</math>II</li> </ul>                                                                                                     |
| 2017; Barbosa        | RCT | <ul style="list-style-type: none"> <li>•Birth weight <math>&gt;</math>1000 g</li> <li>•Gestational age: 28-35 weeks</li> <li>•RDS diagnosis</li> </ul>   | <ul style="list-style-type: none"> <li>•Major congenital abnormalities</li> <li>•History of intubation</li> <li>•5-minute Apgar score <math>&lt;</math>3</li> <li>•History of chorioamnionitis</li> <li>•Fever/rupture of membranes <math>&gt;</math>18 h</li> </ul> | Laryngeal mask                        | NR  | No       | Curosurf <sup>®</sup> ,<br>200 mg/kg | Yes | InSurE | <ul style="list-style-type: none"> <li>•MV within 72h</li> <li>•Pneumothorax</li> <li>•IVH</li> <li>•Repeat dose</li> </ul>                                                                                                         |
| 2016; Li             | RC  | <ul style="list-style-type: none"> <li>•Gestational age: 27-32 weeks</li> <li>•RDS diagnosis</li> </ul>                                                  | <ul style="list-style-type: none"> <li>•Major congenital abnormalities</li> <li>•Perinatal asphyxia</li> </ul>                                                                                                                                                       | Thin catheter/<br>4F nasogastric tube | Yes | No       | Curosurf <sup>®</sup> ,<br>200 mg/kg | Yes | InSurE | <ul style="list-style-type: none"> <li>•Mortality</li> <li>•BPD</li> <li>•IVH</li> <li>•NEC</li> <li>•PVL</li> </ul>                                                                                                                |
| 2016; Canals Candela | RC  | <ul style="list-style-type: none"> <li>•Gestational age <math>&lt;</math>34 weeks</li> <li>•RDS diagnosis</li> </ul>                                     | <ul style="list-style-type: none"> <li>•Major congenital abnormalities</li> <li>•Need of intubation for resuscitation</li> </ul>                                                                                                                                     | Thin catheter/<br>Angiocath           | No  | No       | Curosurf <sup>®</sup> ,<br>200 mg/kg | Yes | InSurE | <ul style="list-style-type: none"> <li>•MV within 72h</li> </ul>                                                                                                                                                                    |
| 2015; Teig           | RC  | <ul style="list-style-type: none"> <li>•Gestational age <math>&lt;</math>29 weeks</li> <li>•RDS diagnosis</li> </ul>                                     | <ul style="list-style-type: none"> <li>•Major congenital abnormalities</li> </ul>                                                                                                                                                                                    | Thin catheter/<br>4F suction catheter | Yes | No       | Curosurf <sup>®</sup> ,<br>200 mg/kg | Yes | InSurE | <ul style="list-style-type: none"> <li>•Mortality</li> <li>•MV</li> <li>•hs-PDA</li> <li>•Repeat dose</li> </ul>                                                                                                                    |
| 2015; Pinheiro       | RCT | <ul style="list-style-type: none"> <li>•Gestational age: 29-37 weeks</li> <li>•RDS diagnosis</li> </ul>                                                  | <ul style="list-style-type: none"> <li>•Major congenital abnormalities</li> <li>•5-minute Apgar score <math>\leq</math>3</li> <li>•History of intubation or surfactant</li> <li>•Birth weight <math>&lt;</math>1000 g</li> <li>•Severe RDS</li> </ul>                | Laryngeal mask                        | NA  | Atropine | Infasurf <sup>®</sup> ,<br>3 ml/kg   | Yes | InSurE | <ul style="list-style-type: none"> <li>•Mortality</li> <li>•BPD at 36w</li> <li>•Pneumothorax</li> </ul>                                                                                                                            |
| 2015; Mohammadzadeh  | RCT | <ul style="list-style-type: none"> <li>•Birth weight: 1000-1800 g</li> <li>•Gestational age <math>\leq</math>34 weeks</li> <li>•RDS diagnosis</li> </ul> | <ul style="list-style-type: none"> <li>•Major congenital abnormalities</li> <li>•5-minute Apgar score <math>\leq</math>4</li> <li>•History of chorioamnionitis</li> <li>•Need of intubation for resuscitation</li> </ul>                                             | Thin catheter/<br>4F nasogastric tube | No  | Atropine | Curosurf <sup>®</sup> ,<br>200 mg/kg | Yes | InSurE | <ul style="list-style-type: none"> <li>•Mortality</li> <li>•MV within 72h</li> <li>•IVH</li> <li>•Repeat dose</li> </ul>                                                                                                            |
| 2015; Kribs          | RCT | <ul style="list-style-type: none"> <li>•Gestational age: 23-26 weeks</li> <li>•RDS diagnosis</li> </ul>                                                  | <ul style="list-style-type: none"> <li>•Major congenital abnormalities</li> <li>•Cardiopulmonary failure</li> </ul>                                                                                                                                                  | Thin catheter/<br>4F nasogastric tube | Yes | No       | Curosurf <sup>®</sup> ,<br>100 mg/kg | Yes | InSurE | <ul style="list-style-type: none"> <li>•Mortality</li> <li>•MV</li> <li>•BPD at 36w</li> <li>•Pneumothorax</li> <li>•IVH grade <math>&gt;</math>II</li> <li>•NEC stage <math>&gt;</math>2</li> <li>•PVL</li> <li>•hs-PDA</li> </ul> |
| 2015; Göpel          | PC  | <ul style="list-style-type: none"> <li>•Birth weight <math>&lt;</math>1500 g</li> <li>•Gestational age <math>&lt;</math>32 weeks</li> </ul>              | <ul style="list-style-type: none"> <li>•Need of intubation for resuscitation</li> </ul>                                                                                                                                                                              | Thin catheter/<br>nasogastric tube    | Yes | No       | Curosurf <sup>®</sup> ,<br>100 mg/kg | Yes | InSurE | <ul style="list-style-type: none"> <li>•Mortality</li> <li>•MV</li> <li>•BPD at 36w</li> <li>•Pneumothorax</li> <li>•IVH grade <math>&gt;</math>II</li> <li>•PVL</li> <li>•NEC stage <math>&gt;</math>2</li> </ul>                  |
| 2015; Bao            | RCT | <ul style="list-style-type: none"> <li>•Gestational age: 28-32 weeks</li> <li>•RDS diagnosis</li> </ul>                                                  | <ul style="list-style-type: none"> <li>•Major congenital abnormalities</li> <li>•History of intubation</li> </ul>                                                                                                                                                    | Thin catheter/<br>16G Angiocath       | No  | No       | Curosurf <sup>®</sup> ,<br>200 mg/kg | Yes | InSurE | <ul style="list-style-type: none"> <li>•Mortality</li> <li>•MV within 72h</li> <li>•BPD at 36w</li> <li>•Pneumothorax</li> <li>•Repeat dose</li> </ul>                                                                              |

|                              |     |                                                 |                                                                                                        |                                          |     |          |                                      |     |                  |                                                                                                              |
|------------------------------|-----|-------------------------------------------------|--------------------------------------------------------------------------------------------------------|------------------------------------------|-----|----------|--------------------------------------|-----|------------------|--------------------------------------------------------------------------------------------------------------|
| 2014; Krajewski              | RC  | •Gestational age <36 weeks<br>•RDS diagnosis    | •Need of intubation for resuscitation                                                                  | Thin catheter/<br>4F nasogastric<br>tube | Yes | No       | Curosurf <sup>®</sup> ,<br>200 mg/kg | Yes | InSurE           | •Mortality<br>•MV<br>•BPD<br>•IVH grade ≥II<br>•NEC<br>•PDA                                                  |
| 2014; Aguar                  | PC  | •Gestational age: 24-35 weeks<br>•RDS diagnosis | •Major congenital abnormalities<br>•Need of intubation for resuscitation                               | Thin catheter/<br>6F nasogastric<br>tube | Yes | Atropine | Curosurf <sup>®</sup> ,<br>100 mg/kg | Yes | InSurE           | •Mortality<br>•MV<br>•BPD<br>•IVH grade >II<br>•NEC<br>•PDA<br>•Repeat dose                                  |
| 2013; Sadeghnia              | RCT | •RDS diagnosis                                  | •Major congenital abnormalities<br>•Perinatal asphyxia                                                 | Laryngeal mask                           | NA  | No       | Survanta <sup>®</sup> ,<br>100 mg/kg | Yes | InSurE           | •MV<br>•Pneumothorax<br>•Repeat dose                                                                         |
| 2013; Mirnia                 | RCT | •Gestational age: 27-32 weeks<br>•RDS diagnosis | •Major congenital abnormalities<br>•5-minute Apgar score <6                                            | Thin catheter/<br>5F nasogastric<br>tube | No  | Atropine | Curosurf <sup>®</sup> ,<br>200 mg/kg | Yes | InSurE           | •Mortality<br>•MV<br>•BPD at 36w<br>•Pneumothorax<br>•IVH grade ≥II<br>•NEC stage ≥2<br>•PDA<br>•Repeat dose |
| 2013; Klebermass-Schrehof    | RC  | •Gestational age: 23-27 weeks<br>•RDS diagnosis | •Need of intubation for resuscitation                                                                  | Thin catheter/<br>4F nasogastric<br>tube | Yes | No       | Curosurf <sup>®</sup> ,<br>200 mg/kg | Yes | InSurE           | •Mortality<br>•MV<br>•Pneumothorax<br>•IVH grade >II<br>•NEC stage ≥2<br>•PVL<br>•hs-PDA<br>•Repeat dose     |
| 2013; Kanmaz                 | RCT | •Gestational age ≤34 weeks<br>•RDS diagnosis    | •Major congenital abnormalities<br>•Need of intubation for resuscitation                               | Thin catheter/<br>5F nasogastric<br>tube | No  | No       | Curosurf <sup>®</sup> ,<br>100 mg/kg | Yes | InSurE           | •MV<br>•BPD at 36w<br>•Pneumothorax<br>•Repeat dose                                                          |
| 2013; Attridge               | RCT | •RDS diagnosis<br>•Birth weight >1200 g         | •Major congenital abnormalities<br>•History of intubation or surfactant<br>•Pneumothorax at enrollment | Laryngeal mask                           | N/A | No       | Infasurf <sup>®</sup> ,<br>3 ml/kg   | Yes | No<br>surfactant | •MV<br>•Pneumothorax                                                                                         |
| 2000; Berggren               | RCT | •Gestational age <36 weeks<br>•RDS diagnosis    | •Major congenital abnormalities<br>•a/A p <sub>a</sub> O <sub>2</sub> <15                              | Nebulization                             | NA  | No       | 480 mg                               | Yes | No<br>surfactant | •MV<br>•IVH                                                                                                  |
| 1987; Ten Centre Study Group | RCT | •Gestational age: 25-29 weeks<br>•RDS diagnosis | •Major congenital abnormalities                                                                        | Pharyngeal<br>instillation               | NA  | No       | 100 mg                               | No  | No<br>surfactant | •Mortality<br>•Pneumothorax<br>•NEC<br>•PDA                                                                  |

**Suppl. Table 1.** Methodological characteristics of the included studies. *nCPAP*: nasal continuous positive airway pressure; *NEC*: necrotizing enterocolitis; *PVL*: periventricular leukomalacia; *BPD*: bronchopulmonary dysplasia; *hs-PDA*: hemodynamically significant patent ductus arteriosus; *InSurE*:

*intubation, surfactant administration and extubation; IVH: intraventricular hemorrhage; MV: mechanical ventilation; NA: not applicable; NR: not reported; PC: prospective cohort; PROM: premature rupture of membranes; RC: retrospective cohort; RCT: randomized controlled trial; RDS: respiratory distress syndrome; SURE: surfactant administration without extubation;*



### Appendix 3: Network plots

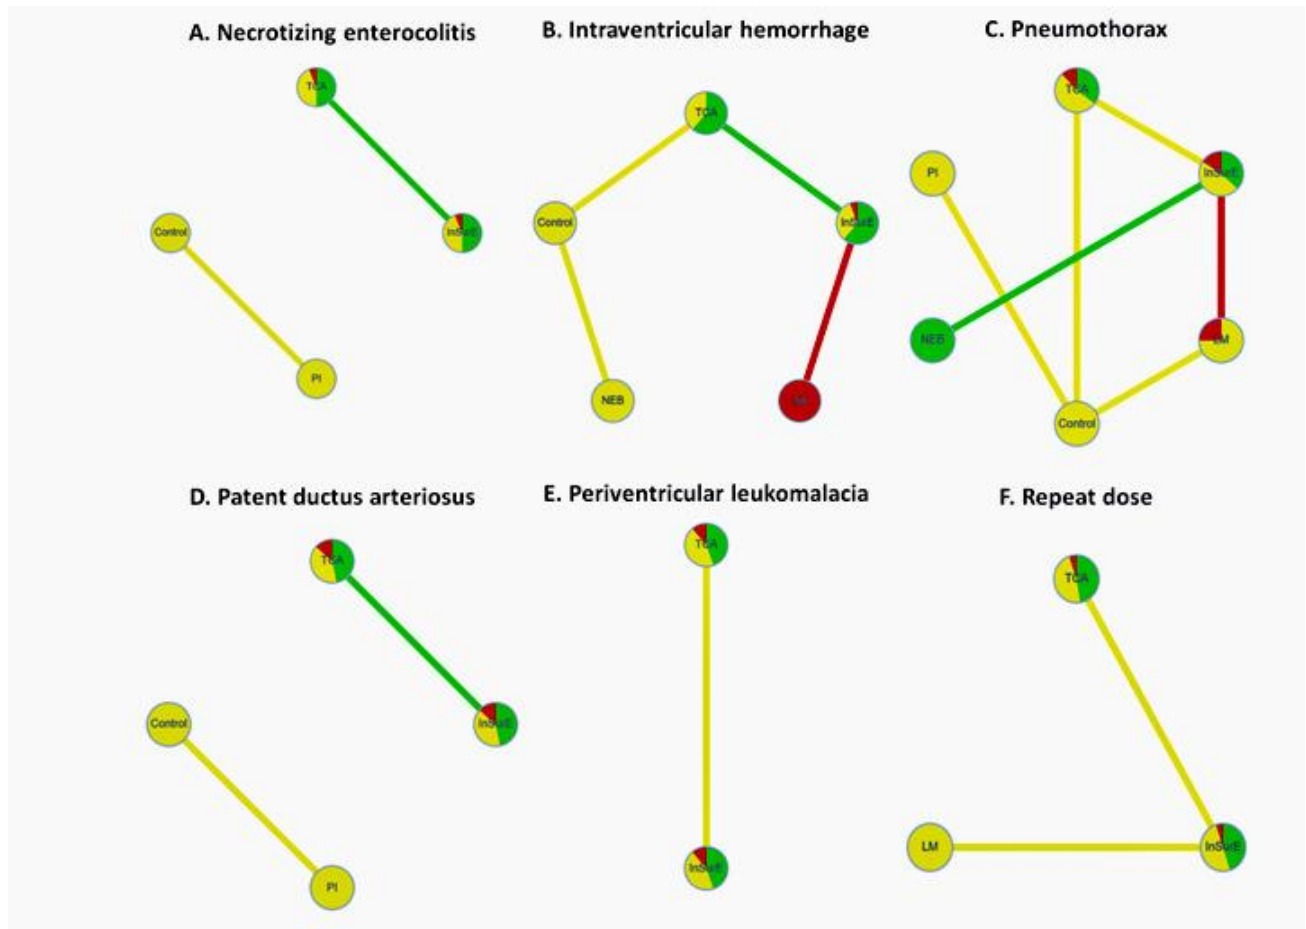

**Suppl. Figure 2.** Network plots of the secondary outcomes.

The colors of circles are proportional to the risk of bias in studies including the treatment. Control refers to no surfactant administration.

*InSurE: intubation, surfactant administration, extubation; LM: laryngeal mask; NEB: nebulized; PI: pharyngeal instillation; TCA: thin catheter administration*

## Appendix 4: Risk of bias evaluation

|                     | Random sequence generation (selection bias) | Allocation concealment (selection bias) | Blinding of participants and personnel (performance bias) | Blinding of outcome assessment (detection bias) | Incomplete outcome data (attrition bias) | Selective reporting (reporting bias) | Other bias |
|---------------------|---------------------------------------------|-----------------------------------------|-----------------------------------------------------------|-------------------------------------------------|------------------------------------------|--------------------------------------|------------|
| 2000; Berggren      | +                                           | +                                       | ?                                                         | +                                               | +                                        | ?                                    | +          |
| 2013; Attridge      | +                                           | +                                       | -                                                         | +                                               | +                                        | ?                                    | +          |
| 2013; Kanmaz        | +                                           | +                                       | ?                                                         | +                                               | +                                        | +                                    | +          |
| 2013; Mirnia        | +                                           | ?                                       | ?                                                         | +                                               | +                                        | +                                    | +          |
| 2013; Sadeghnia     | +                                           | ?                                       | ?                                                         | +                                               | ?                                        | ?                                    | +          |
| 2015; Bao           | +                                           | ?                                       | -                                                         | +                                               | +                                        | +                                    | +          |
| 2015; Kribs         | +                                           | +                                       | -                                                         | +                                               | +                                        | +                                    | +          |
| 2015; Mohammadzadeh | +                                           | +                                       | +                                                         | +                                               | +                                        | +                                    | +          |
| 2015; Pinheiro      | +                                           | +                                       | -                                                         | +                                               | +                                        | +                                    | +          |
| 2017; Barbosa       | +                                           | ?                                       | -                                                         | +                                               | +                                        | ?                                    | +          |
| 2017; Olivier       | +                                           | +                                       | -                                                         | +                                               | +                                        | +                                    | +          |
| 2017; Roberts       | +                                           | +                                       | -                                                         | +                                               | +                                        | +                                    | +          |
| 2019; Halim         | +                                           | ?                                       | -                                                         | +                                               | +                                        | +                                    | +          |
| 2019; Jena          | +                                           | +                                       | -                                                         | +                                               | +                                        | +                                    | +          |
| 2019; Minocchieri   | +                                           | +                                       | +                                                         | +                                               | +                                        | +                                    | +          |
| Ten Centre Trial    | +                                           | +                                       | -                                                         | +                                               | +                                        | ?                                    | +          |

Suppl. Figure 3. Quality assessment of randomized controlled trials.

| Risk Of Bias In Non-randomized Studies - of Interventions (ROBINS-I) tool |                         |                                                  |                                         |                                                    |                          |                                 |                                          |              |
|---------------------------------------------------------------------------|-------------------------|--------------------------------------------------|-----------------------------------------|----------------------------------------------------|--------------------------|---------------------------------|------------------------------------------|--------------|
| Year; Author                                                              | Bias due to confounding | Bias in selection of participants into the study | Bias in classification of interventions | Bias due to deviations from intended interventions | Bias due to missing data | Bias in measurement of outcomes | Bias in selection of the reported result | Overall bias |
| 2019; Legge                                                               | Moderate                | Low                                              | Low                                     | NI                                                 | Low                      | Low                             | Low                                      | Moderate     |
| 2019; Isidro                                                              | Low                     | Low                                              | Low                                     | Low                                                | NI                       | Low                             | Low                                      | Low          |
| 2019; Hanke                                                               | Moderate                | Low                                              | Low                                     | Low                                                | Low                      | Low                             | NI                                       | Moderate     |
| 2019; Buyuktiryaki                                                        | Low                     | Low                                              | Low                                     | Low                                                | NI                       | Low                             | Low                                      | Low          |
| 2019; Berneau                                                             | Low                     | Low                                              | Low                                     | Moderate                                           | Low                      | Low                             | Low                                      | Moderate     |
| 2018; Seo                                                                 | Low                     | Low                                              | Low                                     | Low                                                | Low                      | Low                             | NI                                       | Low          |
| 2018; Ramos-Navarro                                                       | Moderate                | Low                                              | Low                                     | Low                                                | Low                      | Low                             | NI                                       | Moderate     |
| 2018; Langhammer                                                          | Low                     | Low                                              | Low                                     | Low                                                | Low                      | Low                             | Low                                      | Low          |
| 2018; Hartel                                                              | High                    | Low                                              | Low                                     | Low                                                | Low                      | Low                             | NI                                       | High         |
| 2018; Dargaville                                                          | Moderate                | Moderate                                         | Low                                     | Low                                                | Low                      | Low                             | Low                                      | Moderate     |
| 2017; Tomar                                                               | Low                     | Low                                              | Low                                     | Low                                                | NI                       | Low                             | Low                                      | Low          |
| 2017; Templin                                                             | Low                     | Low                                              | Low                                     | Low                                                | Low                      | Low                             | Low                                      | Low          |
| 2017; Bertini                                                             | Low                     | Low                                              | Low                                     | Low                                                | Low                      | Low                             | NI                                       | Low          |
| 2016; Li                                                                  | Low                     | Low                                              | Low                                     | Low                                                | Low                      | Low                             | NI                                       | Low          |
| 2016; Canals Candela                                                      | Low                     | Low                                              | Low                                     | Low                                                | NI                       | Low                             | Low                                      | Low          |
| 2015; Teig                                                                | Moderate                | Low                                              | Low                                     | Low                                                | Low                      | Low                             | Low                                      | Moderate     |
| 2015; Göpel                                                               | Low                     | Moderate                                         | Low                                     | Low                                                | Low                      | Low                             | Low                                      | Moderate     |
| 2014; Krajewski                                                           | Low                     | Low                                              | Low                                     | Low                                                | Low                      | Low                             | Low                                      | Low          |
| 2014; Aguar                                                               | Low                     | Low                                              | Low                                     | Low                                                | Low                      | Low                             | Low                                      | Low          |
| 2013; Klebermass-Schrehof                                                 | Moderate                | Moderate                                         | Low                                     | Low                                                | Low                      | Low                             | Low                                      | Moderate     |

Suppl. Table 2. Quality assessment of observational studies.

NI: no information

## Appendix 5: Meta-regression analysis

| Comparison          | RCT                      | Sample size              | Type of surfactant        | Premedication            | Use of forceps           |
|---------------------|--------------------------|--------------------------|---------------------------|--------------------------|--------------------------|
| <i>Mortality</i>    | -0.196 (-0.859 to 0.366) | 0.459 (-0.288 to 1.200)  | -0.094 (-0.805 to 0.615)  | -0.275 (-1.018 to 0.327) | 0.088 (-0.536 to 0.823)  |
| <i>Need of MV</i>   | -0.339 (-1.594 to 0.817) | 0.484 (-0.674 to 1.713)  | -0.747 (-2.451 to 0.983)  | 0.404 (-0.901 to 1.637)  | -0.523 (-1.741 to 0.789) |
| <i>BPD</i>          | -0.145 (-0.907 to 0.604) | 0.673 (-0.112 to 1.464)  | -0.525 (-2.975 to 1.303)  | 0.778 (-0.081 to 1.628)  | 0.443 (-0.360 to 1.268)  |
| <i>NEC</i>          | -0.313 (-1.434 to 0.459) | 0.086 (-0.822 to 1.130)  | 0.097 (-0.689 to 1.122)   | -0.835 (-2.487 to 0.320) | 0.873 (-0.096 to 1.963)  |
| <i>IVH</i>          | -0.099 (-0.927 to 0.732) | 0.772 (-0.143 to 1.669)  | -0.344 (-1.327 to 0.457)  | 0.322 (-0.545 to 1.213)  | -0.124 (-0.850 to 0.719) |
| <i>Pneumothorax</i> | -0.374 (-1.123 to 0.380) | 0.353 (-0.537 to 1.287)  | -0.604 (-1.764 to 0.527)  | 0.217 (-0.732 to 1.177)  | 0.418 (-0.407 to 1.258)  |
| <i>PVL</i>          | 0.153 (-0.721 to 0.974)  | -0.170 (-1.792 to 1.259) | 0.011 (-14.825 to 15.767) | 0.780 (-0.326 to 2.054)  | 0.039 (-1.012 to 1.128)  |
| <i>PDA</i>          | 0.098 (-0.697 - 0.876)   | 0.178 (-0.579 to 0.923)  | 0.202 (-0.563 to 1.010)   | 0.100 (-0.646 to 0.849)  | -0.092 (-0.806 to 0.554) |
| <i>Repeat dose</i>  | -0.587 (-1.690 to 0.589) | 0.186 (-1.021 to 1.397)  | -0.158 (-1.270 to 0.980)  | 0.104 (-1.099 to 1.347)  | -0.109 (-1.427 to 1.143) |

### Suppl. Table 3. Outcomes of the meta-regression analysis.

Data expressed as  $\beta$  coefficient (95% confidence intervals). InSurE was set to be the reference treatment. No significant associations were noted.

*PVL*: periventricular leukomalacia; *IVH*: intraventricular hemorrhage; *MV*: mechanical ventilation; *BPD*: bronchopulmonary dysplasia; *NEC*: necrotizing enterocolitis; *PDA*: patent ductus arteriosus; *RCT*: randomized controlled trials

## Appendix 6: Gestational age <28 weeks

### A. Mortality

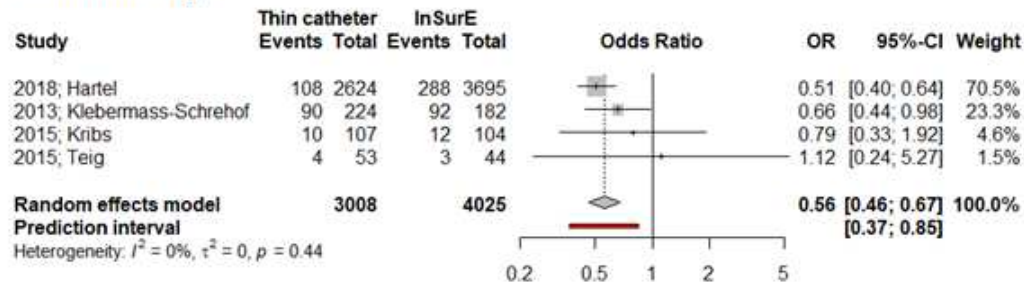

### B. Necrotizing enterocolitis

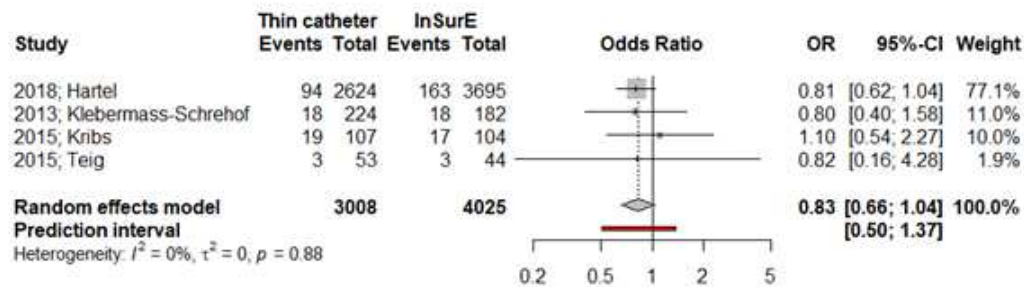

### C. Patent ductus arteriosus

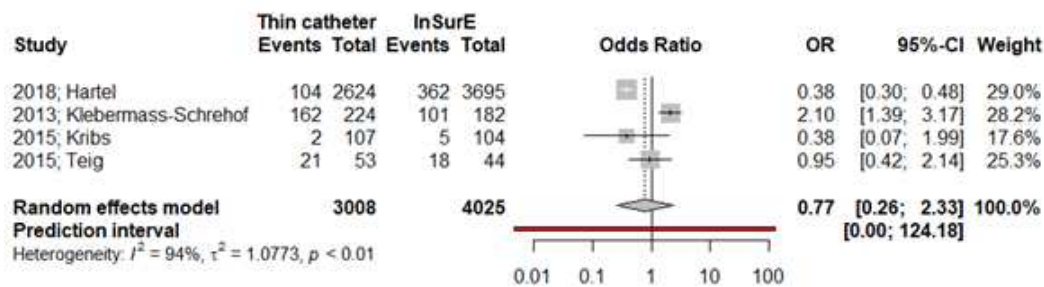

**Suppl. Figure 4.** Outcomes of sensitivity analysis examining neonates with gestational age <28 weeks. Analysis was based on direct evidence.

**Appendix 7: Randomized vs. non-randomized evidence**

| <b>Outcome</b>                      | <b>Randomized controlled trials</b> | <b>Observational studies</b> |
|-------------------------------------|-------------------------------------|------------------------------|
| <i>Mortality</i>                    | 0.62 (0.36-1.06)                    | 0.64 (0.53-0.76) *           |
| <i>Mechanical ventilation</i>       | 0.39 (0.26-0.60) *                  | 0.46 (0.24-0.88) *           |
| <i>Bronchopulmonary dysplasia</i>   | 0.54 (0.29-1.01)                    | 0.54 (0.43-0.68) *           |
| <i>Necrotizing enterocolitis</i>    | 0.33 (0.05-2.02)                    | 0.77 (0.62-0.96) *           |
| <i>Periventricular leukomalacia</i> | N/A                                 | 0.65 (0.52-0.81) *           |
| <i>Pneumothorax</i>                 | 0.59 (0.33-1.03)                    | 0.91 (0.63-1.33)             |
| <i>Intraventricular hemorrhage</i>  | 0.70 (0.40-1.23)                    | 0.84 (0.54-1.29)             |
| <i>Patent ductus arteriosus</i>     | 1.05 (0.62-1.77)                    | 0.86 (0.50-1.49)             |
| <i>Repeat surfactant dose</i>       | 0.90 (0.55-1.46)                    | 1.65 (0.77-3.53)             |

**Suppl. Table 4.** Outcomes of randomized controlled trials and observational studies regarding the comparison of thin catheter administration and InSurE.

Data expressed as odds ratio (95% confidence intervals). \**p*-value <0.05; N/A: not applicable

## Appendix 8: Transitivity assessment

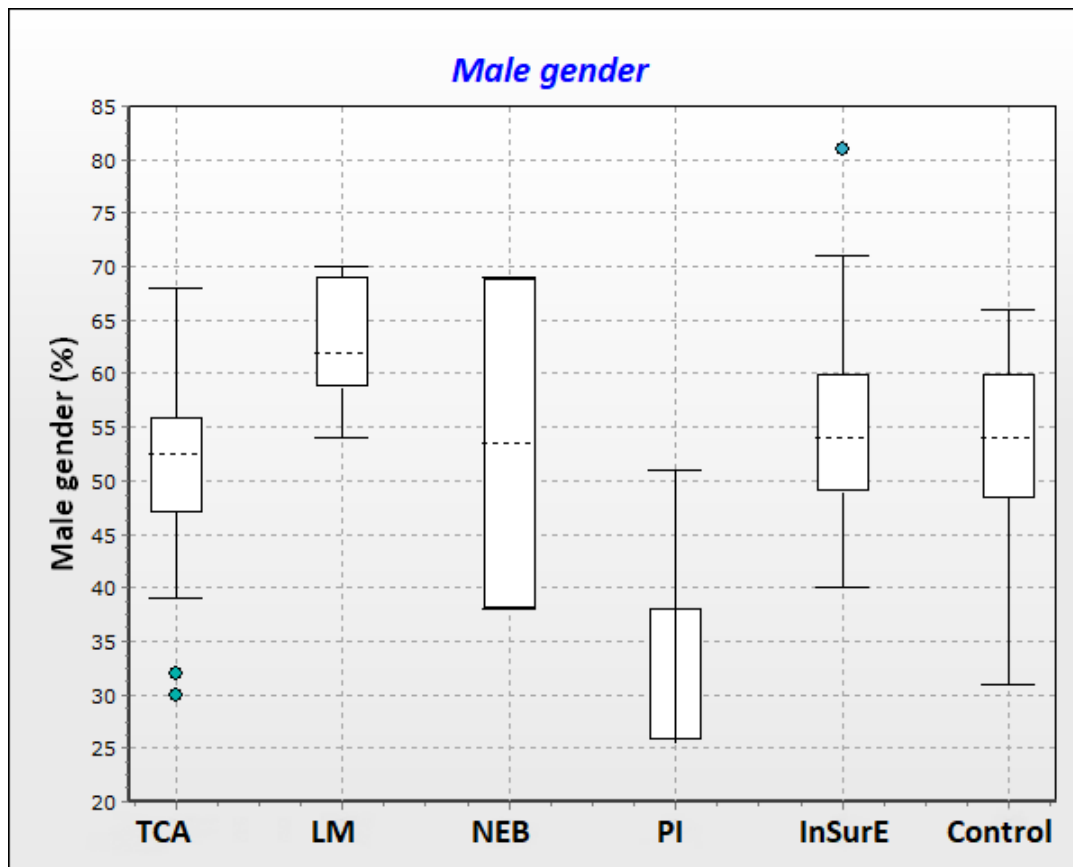

**Suppl. Figure 5.** Boxplot of gender distributions among different interventions.

No significant difference was noted (overall median: 54,  $\chi^2$ : 7.16,  $p$ -value=0.21).

*InSurE*: intubation, surfactant administration, extubation; *TCA*: thin catheter administration *LM*: laryngeal mask;

*NEB*: nebulized; *PI*: pharyngeal instillation;

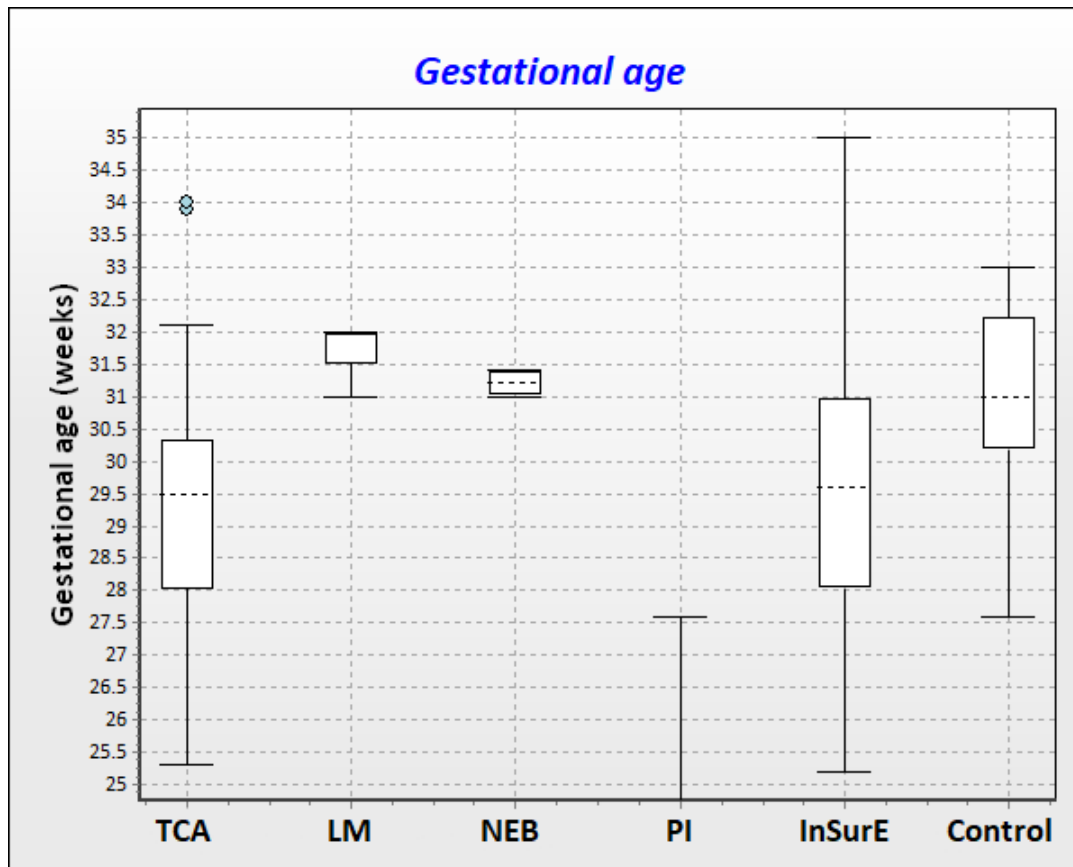

**Suppl. Figure 6.** Boxplot of gestational age distributions among different interventions.

No significant difference was noted (overall median: 29.6,  $\chi^2$ : 10.38,  $p$ -value=0.07).

*InSurE*: intubation, surfactant administration, extubation; *TCA*: thin catheter administration *LM*: laryngeal mask;

*NEB*: nebulized; *PI*: pharyngeal instillation;



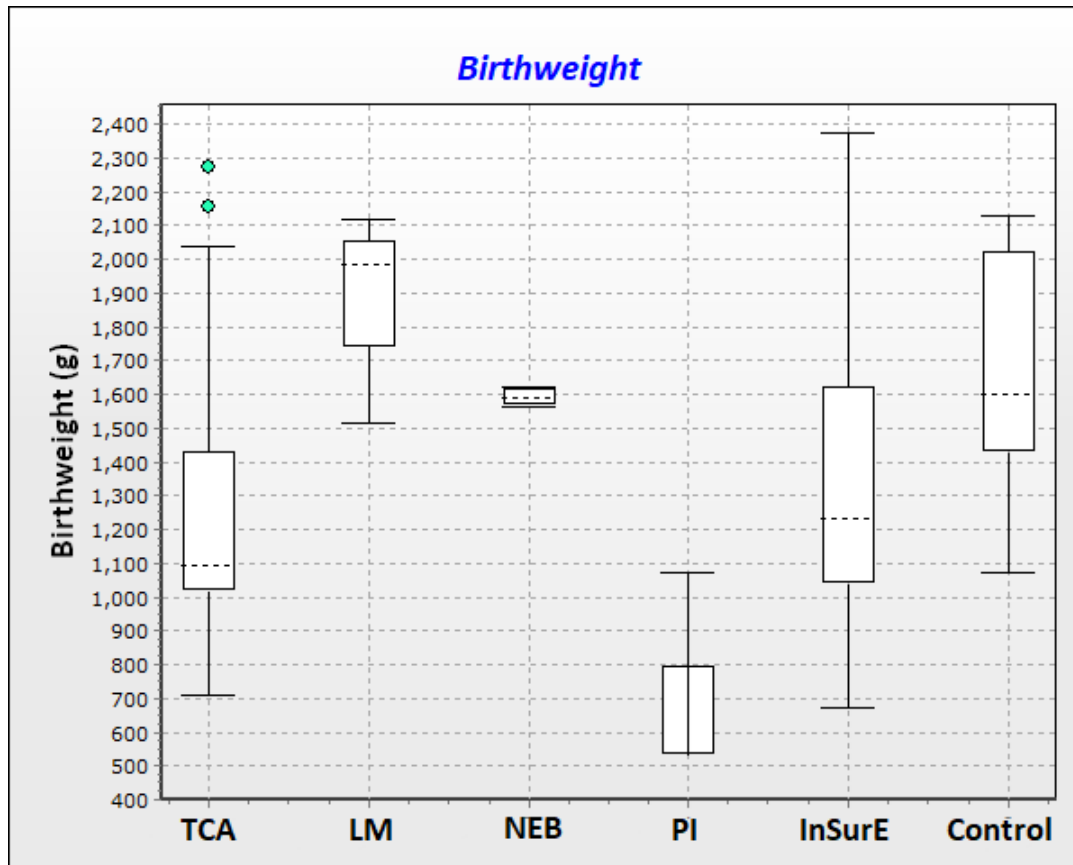

**Suppl. Figure 7.** Boxplot of birthweight distributions among different interventions.

No significant difference was noted (overall median: 1.29,  $\chi^2$ : 10.37,  $p$ -value=0.07).

*InSurE*: intubation, surfactant administration, extubation; *TCA*: thin catheter administration *LM*: laryngeal mask;

*NEB*: nebulized; *PI*: pharyngeal instillation;

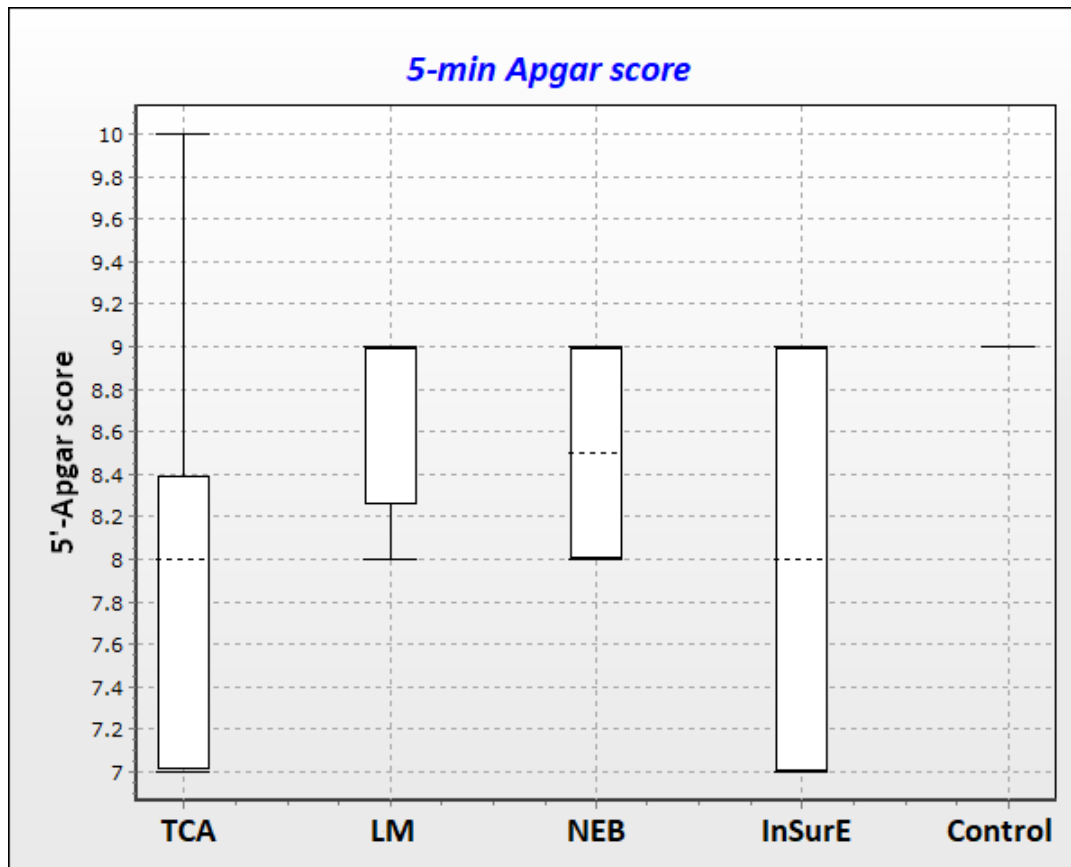

**Suppl. Figure 8.** Boxplot of 5-min Apgar score distributions among different interventions.

No significant difference was noted (overall median: 8,  $\chi^2$ : 10.01,  $p$ -value=0.16).

*InSurE*: intubation, surfactant administration, extubation; *TCA*: thin catheter administration *LM*: laryngeal mask;

*NEB*: nebulized; *PI*: pharyngeal instillation;

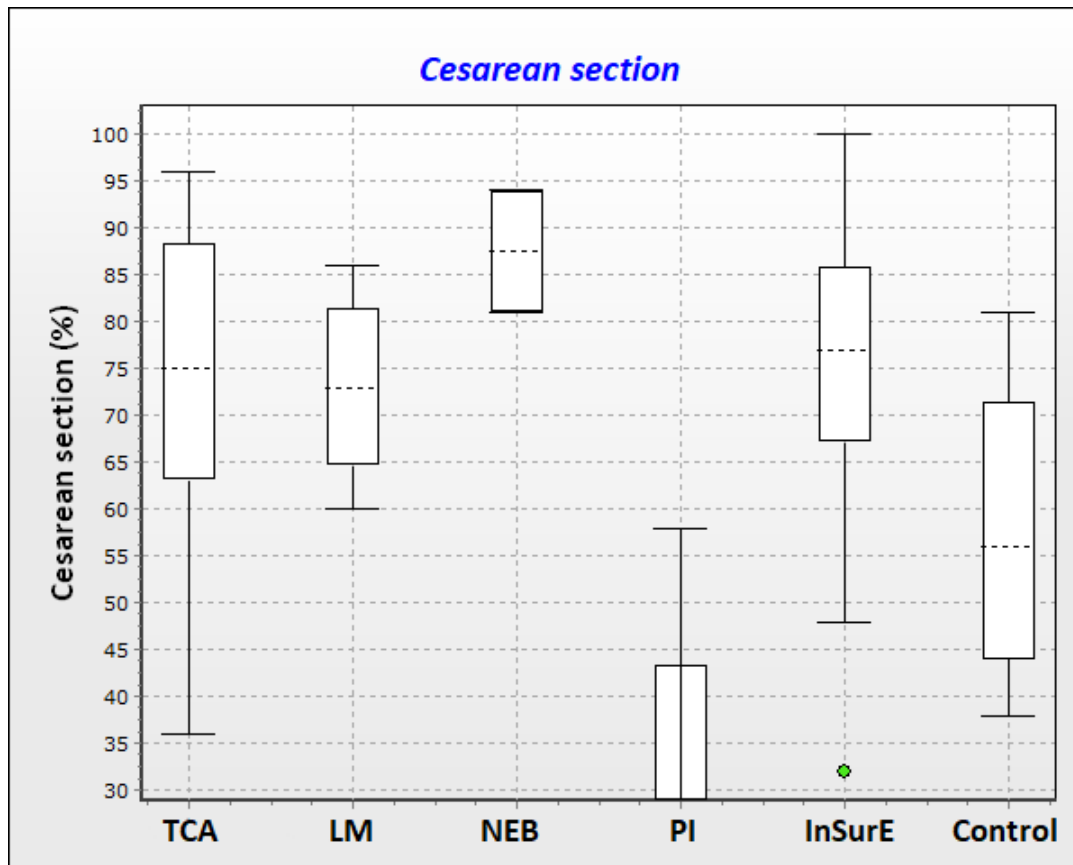

**Suppl. Figure 9.** Boxplot of cesarean section distributions among different interventions.

No significant difference was noted (overall median: 77,  $\chi^2$ : 4.54,  $p$ -value=0.34).

*InSurE*: intubation, surfactant administration, extubation; *TCA*: thin catheter administration *LM*: laryngeal mask;

*NEB*: nebulized; *PI*: pharyngeal instillation;

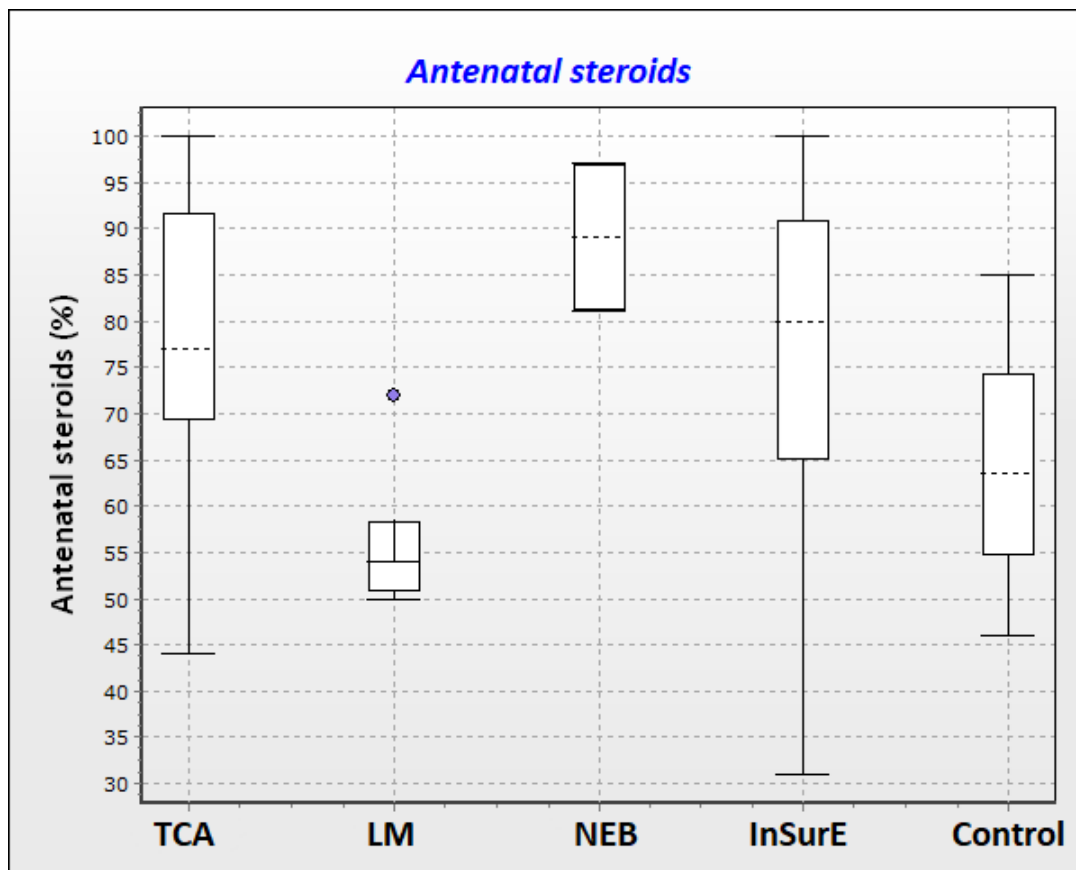

**Suppl. Figure 10.** Boxplot of antenatal steroid administration distributions among different interventions.

No significant difference was noted (overall median: 76.5,  $\chi^2$ : 8.65,  $p$ -value=0.07).

*InSurE*: intubation, surfactant administration, extubation; *TCA*: thin catheter administration *LM*: laryngeal mask;

*NEB*: nebulized; *PI*: pharyngeal instillation;

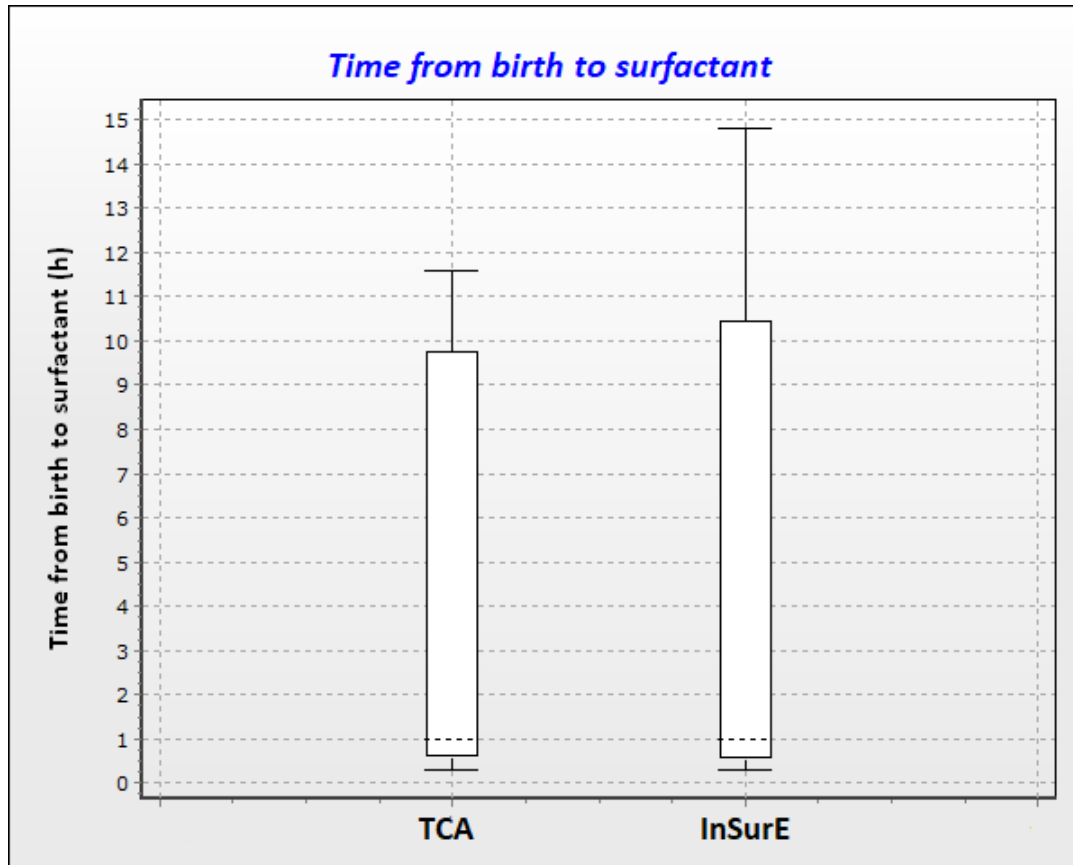

**Suppl. Figure 11.** Boxplot of time from birth to surfactant distributions among different interventions.

No significant difference was noted (overall median: 1,  $\chi^2$ : 0.29,  $p$ -value=0.59).

*InSurE*: intubation, surfactant administration, extubation; *TCA*: thin catheter administration

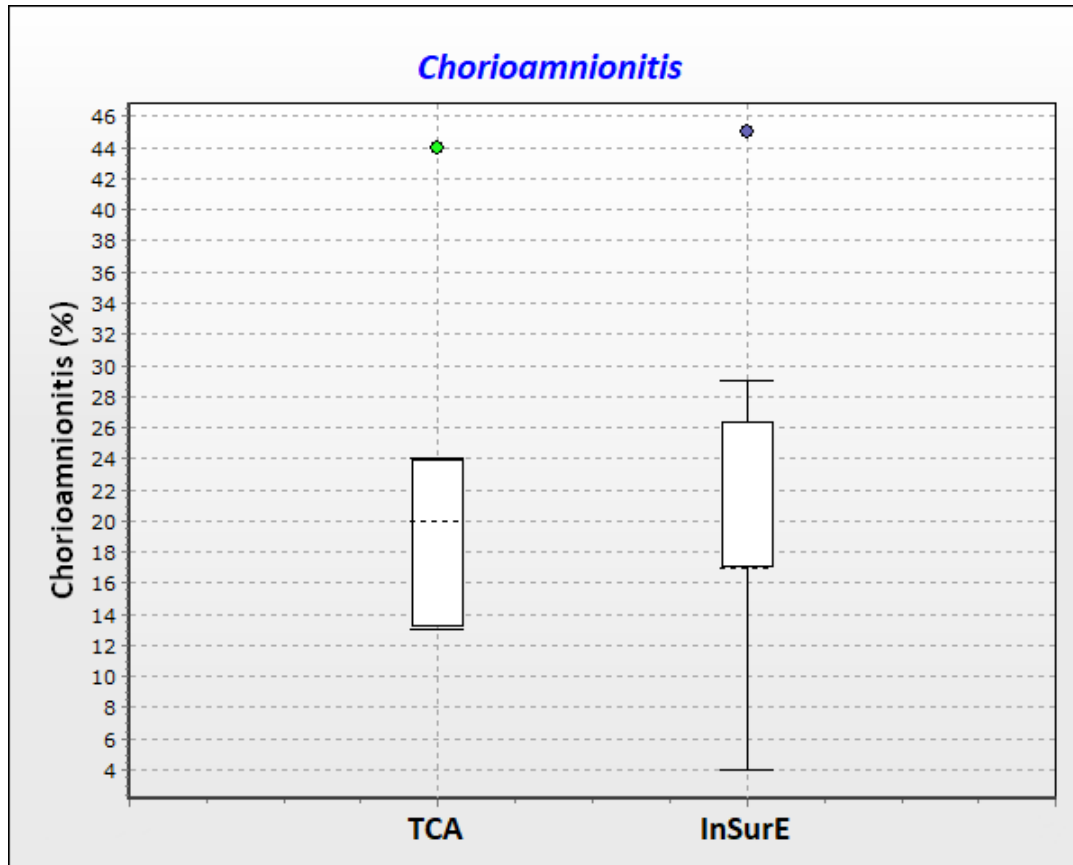

**Suppl. Figure 12.** Boxplot of chorioamnionitis distributions among different interventions.

No significant difference was noted (overall median: 17,  $\chi^2$ : 0.14,  $p$ -value=0.71).

*InSurE*: intubation, surfactant administration, extubation; *TCA*: thin catheter administration

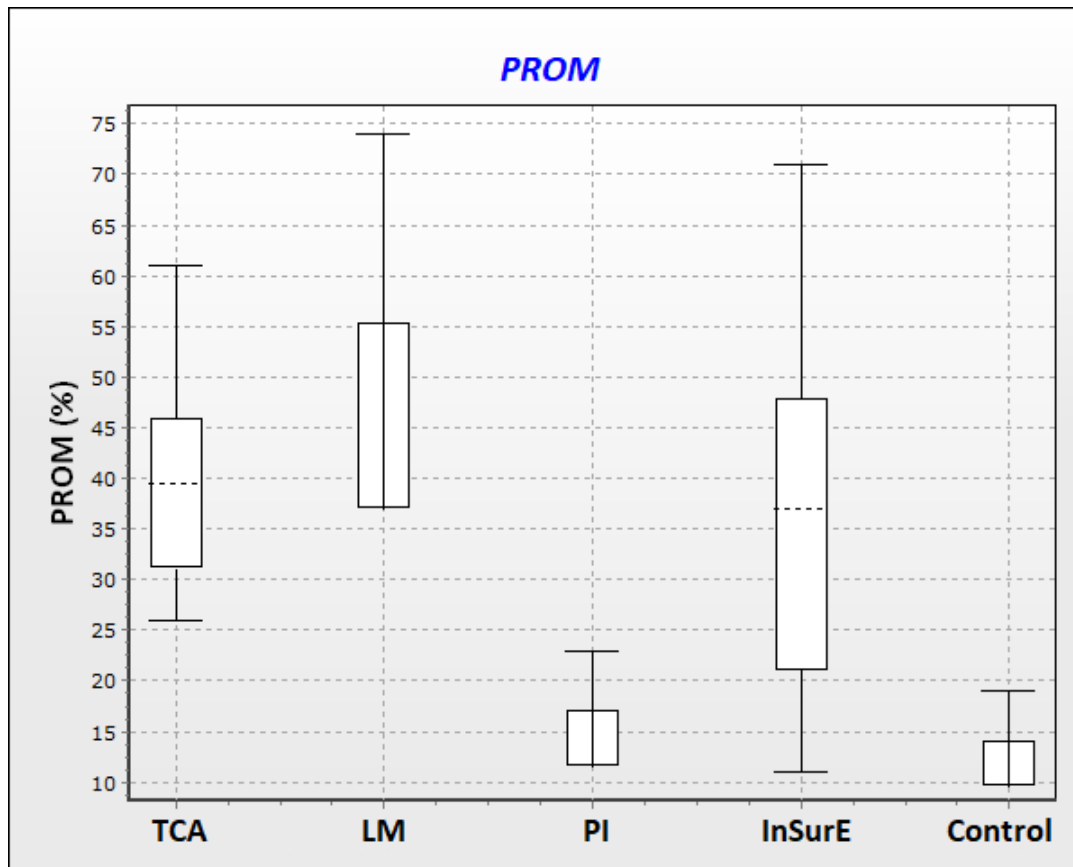

**Suppl. Figure 13.** Boxplot of premature rupture of membrane distributions among different interventions.

No significant difference was noted (overall median: 17,  $\chi^2$ : 0.14,  $p$ -value=0.71).

*InSurE*: intubation, surfactant administration, extubation; *TCA*: thin catheter administration; *LM*: laryngeal mask;

*NEB*: nebulized; *PI*: pharyngeal instillation; *PROM*: premature rupture of membranes

## Appendix 9: Inconsistency assessment

| Comparison                            | Direct odds ratio | Indirect odds ratio | Ratio of odds ratios | p-value |
|---------------------------------------|-------------------|---------------------|----------------------|---------|
| <b>Need of mechanical ventilation</b> |                   |                     |                      |         |
| InSurE vs. TCA                        | 2.36 (1.59-3.51)  | 1.44 (0.01-167.7)   | 1.64 (0.014-194.2)   | 0.839   |
| Control vs. TCA                       | 4.44 (0.88-22.41) | 7.28 (0.08-650.2)   | 0.61 (0.005-72.24)   | 0.839   |
| InSurE vs. LM                         | 1.00 (0.02-68.51) | 1.64 (0.18-15.09)   | 0.61 (0.005-72.24)   | 0.839   |
| Control vs. LM                        | 3.09 (0.71-13.38) | 1.88 (0.02-177.1)   | 1.64 (0.014-194.2)   | 0.839   |
| Control vs. NEB                       | 2.00 (0.50-7.99)  | -                   | N/A                  | N/A     |
| InSurE vs. NEB                        | -                 | 1.00 (0.12-8.07)    | N/A                  | N/A     |
| Control vs. InSurE                    | -                 | 2.00 (0.42-9.53)    | N/A                  | N/A     |
| LM vs. NEB                            | -                 | 0.68 (0.10-4.85)    | N/A                  | N/A     |
| LM vs. TCA                            | -                 | 1.60 (0.23-11.13)   | N/A                  | N/A     |
| NEB vs. TCA                           | -                 | 2.35 (0.30-18.38)   | N/A                  | N/A     |
| <b>Pneumothorax</b>                   |                   |                     |                      |         |
| InSurE vs. TCA                        | 1.25 (0.92-1.71)  | 1.29 (0.18-9.35)    | 0.97 (0.13-7.24)     | 0.978   |
| Control vs. TCA                       | 3.54 (1.38-9.06)  | 3.44 (0.59-20.28)   | 1.03 (0.14-7.65)     | 0.978   |
| InSurE vs. LM                         | 0.57 (0.16-2.04)  | 0.56 (0.12-2.63)    | 1.03 (0.14-7.65)     | 0.978   |
| InSurE vs. NEB                        | 5.32 (0.25-115.5) | -                   | N/A                  | N/A     |
| Control vs. LM                        | 1.57 (0.48-5.18)  | 1.61 (0.32-8.09)    | 0.97 (0.13-7.24)     | 0.978   |
| Control vs. PI                        | 1.17 (0.71-1.92)  | -                   | N/A                  | N/A     |
| LM vs. TCA                            | -                 | 2.22 (0.82-5.99)    | N/A                  | N/A     |
| NEB vs. TCA                           | -                 | 0.24 (0.01-5.19)    | N/A                  | N/A     |
| PI vs. TCA                            | -                 | 3.01 (1.14-7.94)    | N/A                  | N/A     |
| Control vs. InSurE                    | -                 | 2.81 (1.19-6.64)    | N/A                  | N/A     |
| InSurE vs. PI                         | -                 | 0.42 (0.15-1.13)    | N/A                  | N/A     |
| LM vs. NEB                            | -                 | 9.43 (0.37-238.4)   | N/A                  | N/A     |
| LM vs. PI                             | -                 | 0.74 (0.25-2.17)    | N/A                  | N/A     |
| NEB vs. PI                            | -                 | 0.08 (0.01-1.98)    | N/A                  | N/A     |
| Control vs. NEB                       | -                 | 14.95 (0.61-364.75) | N/A                  | N/A     |

### Suppl. Table 5. Outcomes of the SIDE-splitting test, suggesting no inconsistency.

*InSurE*: intubation, surfactant administration, extubation; *LM*: laryngeal mask; *N/A*: not applicable; *NEB*: nebulized; *PI*: pharyngeal instillation; *TCA*: thin catheter administration;



## Appendix 10: Publication bias assessment

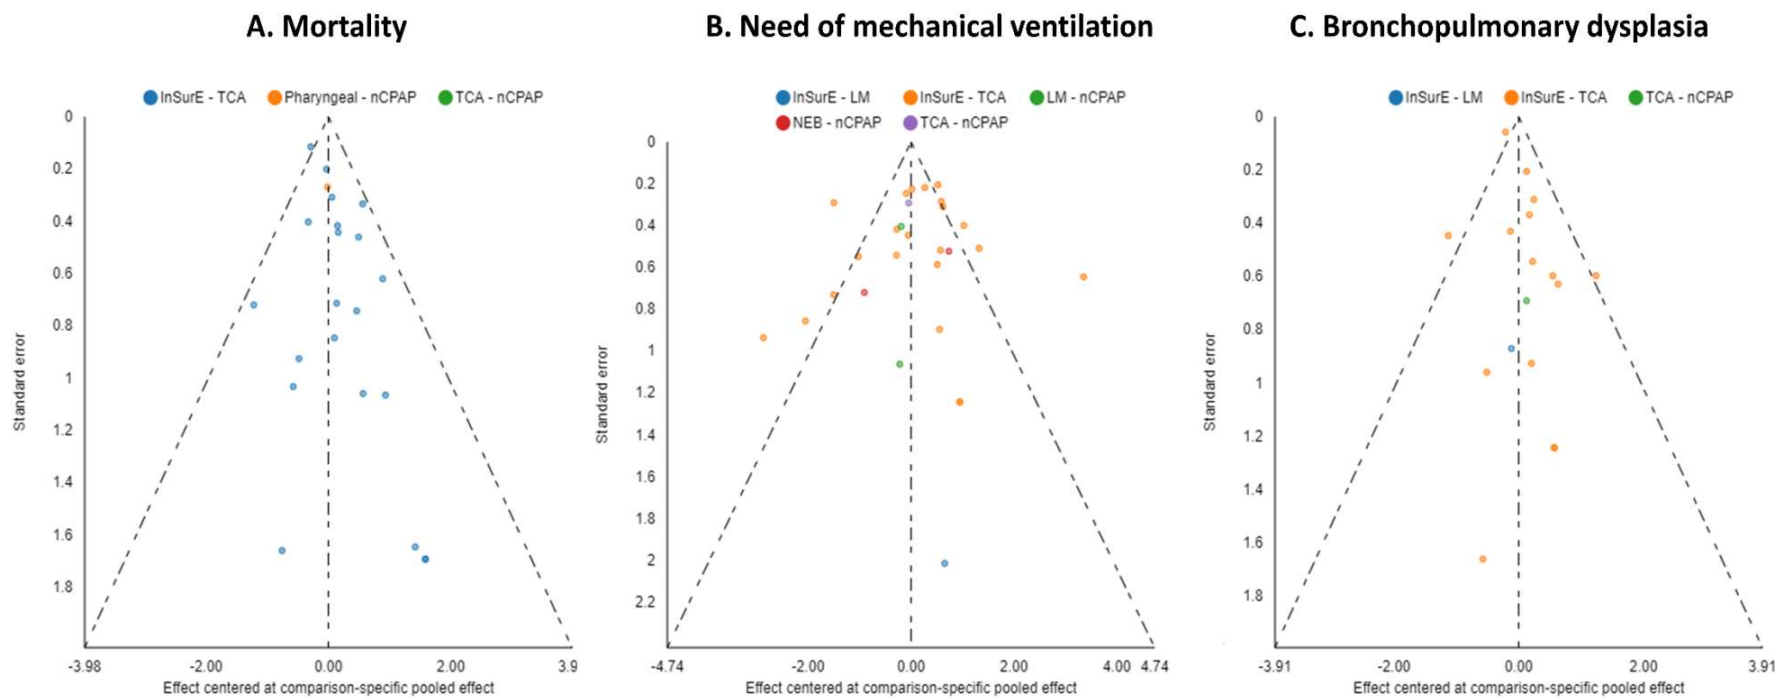

**Suppl. Figure 14.** Comparison-adjusted funnel plots of primary outcomes.

*nCPAP: nasal continuous positive airway pressure; InSurE: intubation, surfactant administration, extubation; LM: laryngeal mask; NEB: nebulized; TCA: thin catheter administration*

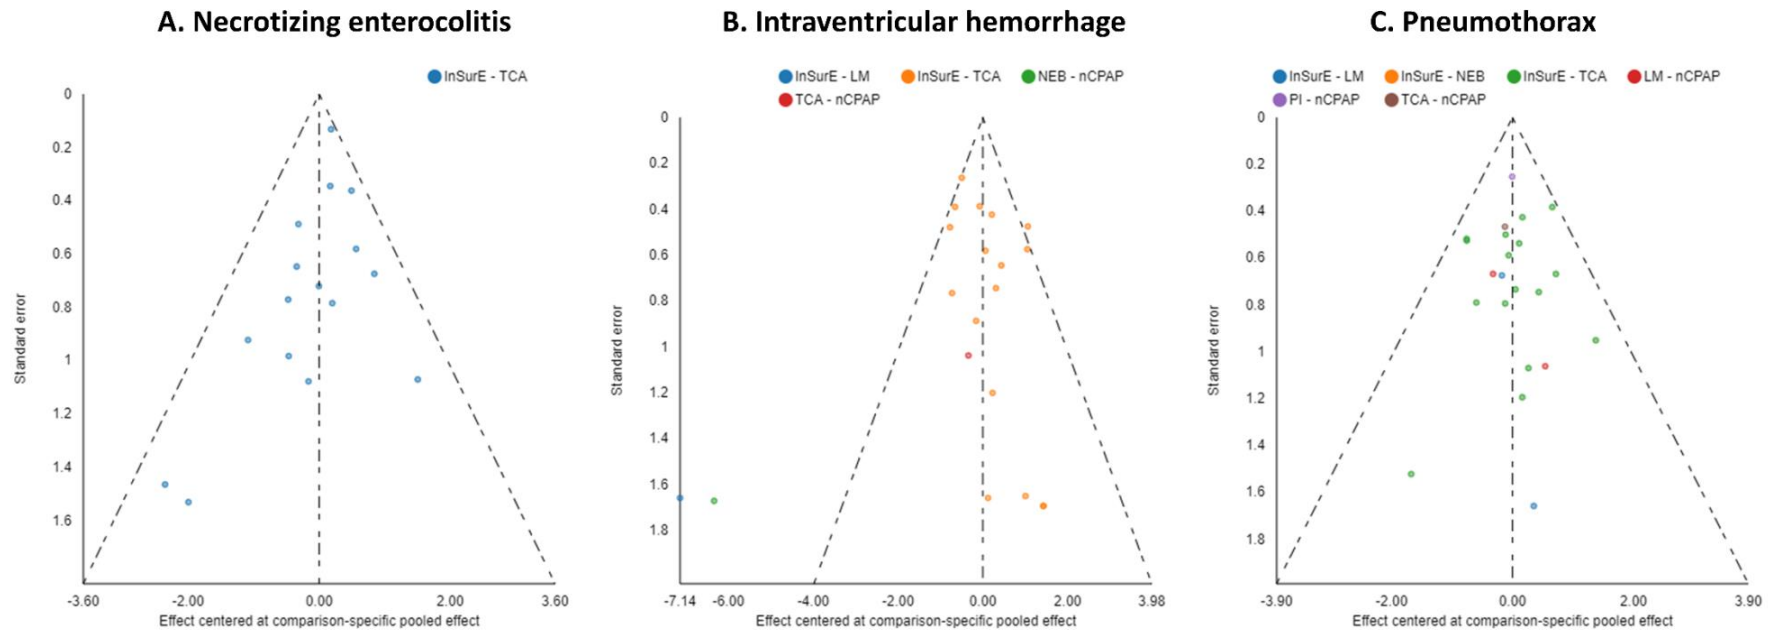

**Suppl. Figure 15.** Comparison-adjusted funnel plots of necrotizing enterocolitis (A), intraventricular hemorrhage (B) and pneumothorax (C).

*nCPAP: nasal continuous positive airway pressure; InSurE: intubation, surfactant administration, extubation; LM: laryngeal mask; NEB: nebulized; TCA: thin catheter administration*

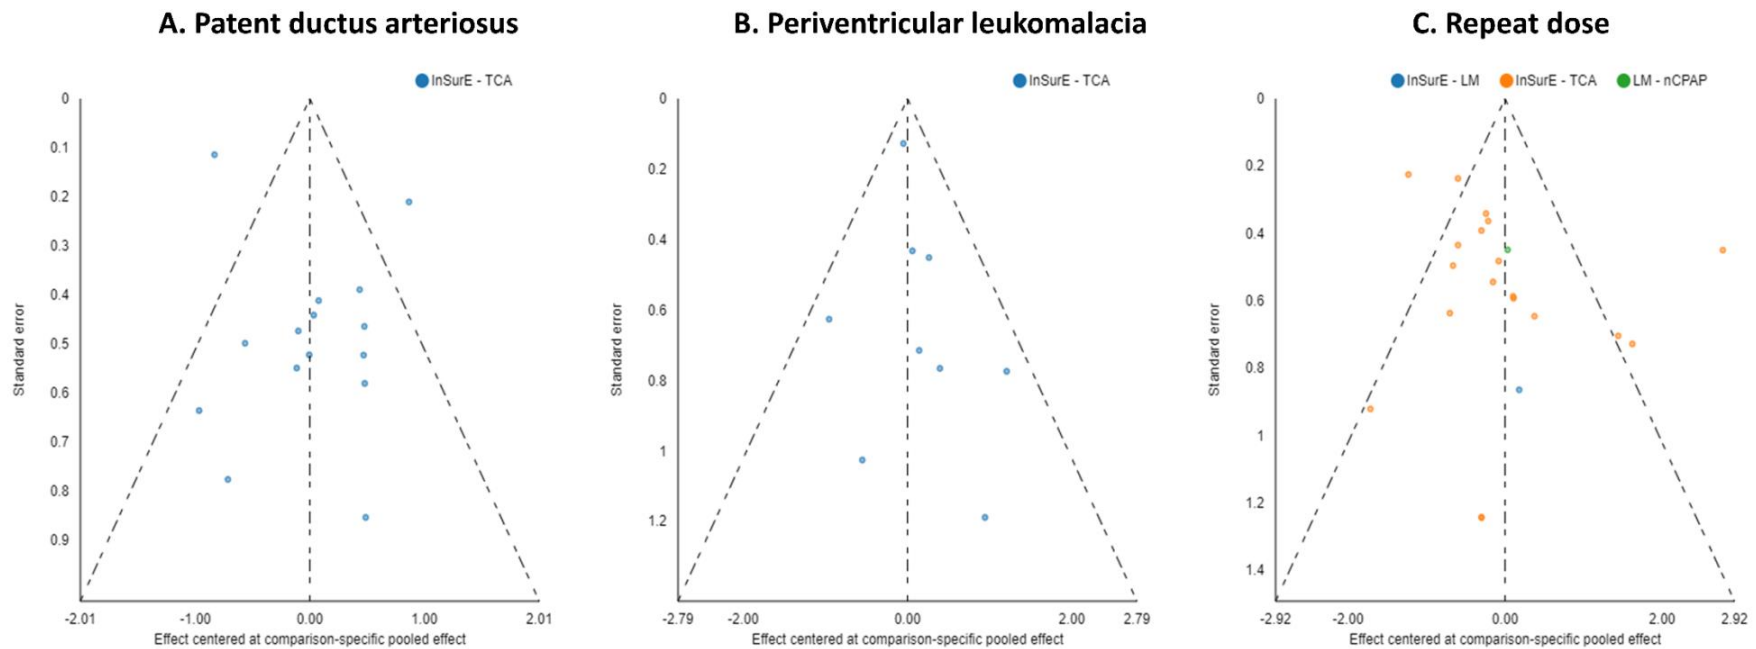

**Suppl. Figure 16.** Comparison-adjusted funnel plots of patent ductus arteriosus (A), periventricular leukomalacia (B) and repeat dose of surfactant (C).

*nCPAP*: nasal continuous positive airway pressure; *InSurE*: intubation, surfactant administration, extubation; *LM*: laryngeal mask; *NEB*: nebulized; *TCA*: thin catheter administration

## Appendix 11: Confidence In Network Meta-Analysis (CiNeMA)

|                   | Comparison                                 | Within-study bias | Reporting bias | Indirectness   | Imprecision    | Heterogeneity  | Incoherence    | Overall quality |
|-------------------|--------------------------------------------|-------------------|----------------|----------------|----------------|----------------|----------------|-----------------|
|                   | <b><u>Intraventricular hemorrhage</u></b>  |                   |                |                |                |                |                |                 |
| Mixed evidence    | TCA vs. InSurE                             | Some concerns     | Undetected     | No concerns    | Major concerns | No concerns    | Major concerns | Low             |
|                   | TCA vs. Control                            | Some concerns     | Undetected     | No concerns    | Major concerns | No concerns    | Major concerns | Low             |
| Indirect evidence | InSurE vs. LM                              | Major concerns    | Suspected      | No concerns    | Major concerns | No concerns    | Major concerns | Very low        |
|                   | NEB vs. Control                            | Some concerns     | Suspected      | No concerns    | Major concerns | No concerns    | Major concerns | Very low        |
|                   | TCA vs. LM                                 | Some concerns     | Suspected      | No concerns    | Major concerns | No concerns    | Major concerns | Very low        |
|                   | TCA vs. NEB                                | Some concerns     | Suspected      | No concerns    | Major concerns | No concerns    | Major concerns | Very low        |
|                   | InSurE vs. NEB                             | Some concerns     | Suspected      | No concerns    | Major concerns | No concerns    | Major concerns | Very low        |
|                   | InSurE vs. Control                         | Some concerns     | Undetected     | No concerns    | Major concerns | No concerns    | Major concerns | Low             |
|                   | LM vs. NEB                                 | Some concerns     | Suspected      | No concerns    | Major concerns | No concerns    | Major concerns | Very low        |
| LM vs. Control    | Some concerns                              | Suspected         | No concerns    | Major concerns | No concerns    | Major concerns | Very low       |                 |
|                   | <b><u>Pneumothorax</u></b>                 |                   |                |                |                |                |                |                 |
| Mixed evidence    | TCA vs. InSurE                             | Some concerns     | Undetected     | No concerns    | Some concerns  | Some concerns  | No concerns    | Moderate        |
|                   | TCA vs. Control                            | Some concerns     | Undetected     | No concerns    | No concerns    | No concerns    | No concerns    | Moderate        |
|                   | InSurE vs. LM                              | Some concerns     | Undetected     | No concerns    | Major concerns | No concerns    | No concerns    | Moderate        |
|                   | InSurE vs. NEB                             | No concerns       | Undetected     | No concerns    | Major concerns | No concerns    | No concerns    | Moderate        |
|                   | LM vs. Control                             | Some concerns     | Undetected     | No concerns    | Major concerns | No concerns    | No concerns    | Moderate        |
|                   | PI vs. Control                             | Some concerns     | Undetected     | No concerns    | Major concerns | No concerns    | No concerns    | Moderate        |
| Indirect evidence | TCA vs. LM                                 | Some concerns     | Undetected     | No concerns    | Major concerns | No concerns    | No concerns    | Moderate        |
|                   | TCA vs. NEB                                | No concerns       | Undetected     | No concerns    | Major concerns | No concerns    | No concerns    | Moderate        |
|                   | TCA vs. PI                                 | Some concerns     | Undetected     | No concerns    | No concerns    | No concerns    | No concerns    | Moderate        |
|                   | InSurE vs. Control                         | Some concerns     | Undetected     | No concerns    | No concerns    | No concerns    | No concerns    | Moderate        |
|                   | InSurE vs. PI                              | Some concerns     | Undetected     | No concerns    | Major concerns | No concerns    | No concerns    | Moderate        |
|                   | LM vs. NEB                                 | Some concerns     | Undetected     | No concerns    | Major concerns | No concerns    | No concerns    | Moderate        |
|                   | LM vs. PI                                  | Some concerns     | Undetected     | No concerns    | Major concerns | No concerns    | No concerns    | Moderate        |
| NEB vs. PI        | Some concerns                              | Undetected        | No concerns    | Major concerns | No concerns    | No concerns    | Moderate       |                 |
| NEB vs. Control   | Some concerns                              | Undetected        | No concerns    | Major concerns | No concerns    | No concerns    | Moderate       |                 |
|                   | <b><u>Repeat dose</u></b>                  |                   |                |                |                |                |                |                 |
| Mixed evidence    | TCA vs. InSurE                             | Some concerns     | Undetected     | No concerns    | Major concerns | No concerns    | Major concerns | Low             |
|                   | InSurE vs. LM                              | Some concerns     | Undetected     | No concerns    | Major concerns | No concerns    | Major concerns | Low             |
| Indirect evidence | TCA vs. LM                                 | Some concerns     | Undetected     | No concerns    | Major concerns | No concerns    | Major concerns | Low             |
|                   | <b><u>Necrotizing enterocolitis</u></b>    |                   |                |                |                |                |                |                 |
| Direct evidence   | TCA vs. InSurE                             | Some concerns     | Undetected     | No concerns    | Some concerns  | No concerns    | Major concerns | Low             |
|                   | PI vs. Control                             | Some concerns     | Undetected     | No concerns    | Major concerns | No concerns    | No concerns    | Moderate        |
|                   | <b><u>Patent ductus arteriosus</u></b>     |                   |                |                |                |                |                |                 |
| Direct evidence   | TCA vs. InSurE                             | Some concerns     | Undetected     | No concerns    | Major concerns | No concerns    | Major concerns | Low             |
|                   | PI vs. Control                             | Some concerns     | Undetected     | No concerns    | Major concerns | No concerns    | No concerns    | Moderate        |
|                   | <b><u>Periventricular leukomalacia</u></b> |                   |                |                |                |                |                |                 |
| Direct evidence   | TCA vs. InSurE                             | Some concerns     | Undetected     | No concerns    | No concerns    | No concerns    | Major concerns | Moderate        |

**Suppl. Table 6.** Credibility of evidence of secondary outcomes. Control refers to no surfactant administration.

*InSurE: intubation, surfactant administration, extubation; LM: laryngeal mask; NEB: nebulized; PI: pharyngeal instillation; TCA: thin catheter administration*

**Appendix 12: PRISMA checklist**

| Section/Topic             | Item # | Checklist Item                                                                                                                                                                                                                                                                                                                                                                                                                                                                                                                                                                                                                                                                                                                                                                         | Reported on page |
|---------------------------|--------|----------------------------------------------------------------------------------------------------------------------------------------------------------------------------------------------------------------------------------------------------------------------------------------------------------------------------------------------------------------------------------------------------------------------------------------------------------------------------------------------------------------------------------------------------------------------------------------------------------------------------------------------------------------------------------------------------------------------------------------------------------------------------------------|------------------|
| <b>TITLE</b>              |        |                                                                                                                                                                                                                                                                                                                                                                                                                                                                                                                                                                                                                                                                                                                                                                                        |                  |
| Title                     | 1      | Identify the report as a systematic review incorporating a network meta-analysis (or related form of meta-analysis).                                                                                                                                                                                                                                                                                                                                                                                                                                                                                                                                                                                                                                                                   | 1                |
| <b>ABSTRACT</b>           |        |                                                                                                                                                                                                                                                                                                                                                                                                                                                                                                                                                                                                                                                                                                                                                                                        |                  |
| Structured summary        | 2      | Provide a structured summary including, as applicable:<br><b>Background:</b> main objectives<br><b>Methods:</b> data sources; study eligibility criteria, participants, and interventions; study appraisal; and <i>synthesis methods, such as network meta-analysis.</i><br><b>Results:</b> number of studies and participants identified; summary estimates with corresponding confidence/credible intervals; <i>treatment rankings may also be discussed. Authors may choose to summarize pairwise comparisons against a chosen treatment included in their analyses for brevity.</i><br><b>Discussion/Conclusions:</b> limitations; conclusions and implications of findings.<br><b>Other:</b> primary source of funding; systematic review registration number with registry name. | 2                |
| <b>INTRODUCTION</b>       |        |                                                                                                                                                                                                                                                                                                                                                                                                                                                                                                                                                                                                                                                                                                                                                                                        |                  |
| Rationale                 | 3      | Describe the rationale for the review in the context of what is already known, <i>including mention of why a network meta-analysis has been conducted.</i>                                                                                                                                                                                                                                                                                                                                                                                                                                                                                                                                                                                                                             | 3                |
| Objectives                | 4      | Provide an explicit statement of questions being addressed, with reference to participants, interventions, comparisons, outcomes, and study design (PICOS).                                                                                                                                                                                                                                                                                                                                                                                                                                                                                                                                                                                                                            | 4                |
| <b>METHODS</b>            |        |                                                                                                                                                                                                                                                                                                                                                                                                                                                                                                                                                                                                                                                                                                                                                                                        |                  |
| Protocol and registration | 5      | Indicate whether a review protocol exists and if and where it can be accessed (e.g., Web address); and, if available, provide registration information, including registration number.                                                                                                                                                                                                                                                                                                                                                                                                                                                                                                                                                                                                 | 4                |
| Eligibility criteria      | 6      | Specify study characteristics (e.g., PICOS, length of follow-up) and report characteristics (e.g., years considered, language, publication status) used as criteria for eligibility, giving rationale. <i>Clearly</i>                                                                                                                                                                                                                                                                                                                                                                                                                                                                                                                                                                  | 4-5              |

|                                        |    |                                                                                                                                                                                                                                                                                                                                                                                                                        |     |
|----------------------------------------|----|------------------------------------------------------------------------------------------------------------------------------------------------------------------------------------------------------------------------------------------------------------------------------------------------------------------------------------------------------------------------------------------------------------------------|-----|
|                                        |    | <i>describe eligible treatments included in the treatment network, and note whether any have been clustered or merged into the same node (with justification).</i>                                                                                                                                                                                                                                                     |     |
| Information sources                    | 7  | Describe all information sources (e.g., databases with dates of coverage, contact with study authors to identify additional studies) in the search and date last searched.                                                                                                                                                                                                                                             | 5   |
| Search                                 | 8  | Present full electronic search strategy for at least one database, including any limits used, such that it could be repeated.                                                                                                                                                                                                                                                                                          | 5   |
| Study selection                        | 9  | State the process for selecting studies (i.e., screening, eligibility, included in systematic review, and, if applicable, included in the meta-analysis).                                                                                                                                                                                                                                                              | 5-6 |
| Data collection process                | 10 | Describe method of data extraction from reports (e.g., piloted forms, independently, in duplicate) and any processes for obtaining and confirming data from investigators.                                                                                                                                                                                                                                             | 6   |
| Data items                             | 11 | List and define all variables for which data were sought (e.g., PICOS, funding sources) and any assumptions and simplifications made.                                                                                                                                                                                                                                                                                  | 6   |
| Geometry of the network                | S1 | Describe methods used to explore the geometry of the treatment network under study and potential biases related to it. This should include how the evidence base has been graphically summarized for presentation, and what characteristics were compiled and used to describe the evidence base to readers.                                                                                                           | 6   |
| Risk of bias within individual studies | 12 | Describe methods used for assessing risk of bias of individual studies (including specification of whether this was done at the study or outcome level), and how this information is to be used in any data synthesis.                                                                                                                                                                                                 | 7   |
| Summary measures                       | 13 | State the principal summary measures (e.g., risk ratio, difference in means). <i>Also describe the use of additional summary measures assessed, such as treatment rankings and surface under the cumulative ranking curve (SUCRA) values, as well as modified approaches used to present summary findings from meta-analyses.</i>                                                                                      | 6   |
| Planned methods of analysis            | 14 | Describe the methods of handling data and combining results of studies for each network meta-analysis. This should include, but not be limited to: <ul style="list-style-type: none"> <li>• <i>Handling of multi-arm trials;</i></li> <li>• <i>Selection of variance structure;</i></li> <li>• <i>Selection of prior distributions in Bayesian analyses; and</i></li> <li>• <i>Assessment of model fit.</i></li> </ul> | 6-7 |

|                                          |    |                                                                                                                                                                                                                                                                                                                                                                                                                                                   |                        |
|------------------------------------------|----|---------------------------------------------------------------------------------------------------------------------------------------------------------------------------------------------------------------------------------------------------------------------------------------------------------------------------------------------------------------------------------------------------------------------------------------------------|------------------------|
| <b>Assessment of Inconsistency</b>       | S2 | Describe the statistical methods used to evaluate the agreement of direct and indirect evidence in the treatment network(s) studied. Describe efforts taken to address its presence when found.                                                                                                                                                                                                                                                   | 7                      |
| Risk of bias across studies              | 15 | Specify any assessment of risk of bias that may affect the cumulative evidence (e.g., publication bias, selective reporting within studies).                                                                                                                                                                                                                                                                                                      | 6-7                    |
| Additional analyses                      | 16 | Describe methods of additional analyses if done, indicating which were pre-specified. This may include, but not be limited to, the following: <ul style="list-style-type: none"> <li>• Sensitivity or subgroup analyses;</li> <li>• Meta-regression analyses;</li> <li>• <i>Alternative formulations of the treatment network; and</i></li> <li>• <i>Use of alternative prior distributions for Bayesian analyses (if applicable).</i></li> </ul> | 6-7                    |
| <b>RESULTS†</b>                          |    |                                                                                                                                                                                                                                                                                                                                                                                                                                                   |                        |
| Study selection                          | 17 | Give numbers of studies screened, assessed for eligibility, and included in the review, with reasons for exclusions at each stage, ideally with a flow diagram.                                                                                                                                                                                                                                                                                   | 8, Appendix 1          |
| <b>Presentation of network structure</b> | S3 | Provide a network graph of the included studies to enable visualization of the geometry of the treatment network.                                                                                                                                                                                                                                                                                                                                 | Figure 1, Appendix 3   |
| <b>Summary of network geometry</b>       | S4 | Provide a brief overview of characteristics of the treatment network. This may include commentary on the abundance of trials and randomized patients for the different interventions and pairwise comparisons in the network, gaps of evidence in the treatment network, and potential biases reflected by the network structure.                                                                                                                 | 8                      |
| Study characteristics                    | 18 | For each study, present characteristics for which data were extracted (e.g., study size, PICOS, follow-up period) and provide the citations.                                                                                                                                                                                                                                                                                                      | 9, Appendix 2, Table 1 |
| Risk of bias within studies              | 19 | Present data on risk of bias of each study and, if available, any outcome level assessment.                                                                                                                                                                                                                                                                                                                                                       | 10, Appendix 4         |
| Results of individual studies            | 20 | For all outcomes considered (benefits or harms), present, for each study: 1) simple summary data for each intervention group, and 2) effect estimates and confidence intervals. <i>Modified approaches may be needed to deal with information from larger networks.</i>                                                                                                                                                                           | 9                      |
| Synthesis of results                     | 21 | Present results of each meta-analysis done, including confidence/credible intervals. <i>In larger</i>                                                                                                                                                                                                                                                                                                                                             | 9-10                   |

|                                      |           |                                                                                                                                                                                                                                                                                                                                                                                                                                |                           |
|--------------------------------------|-----------|--------------------------------------------------------------------------------------------------------------------------------------------------------------------------------------------------------------------------------------------------------------------------------------------------------------------------------------------------------------------------------------------------------------------------------|---------------------------|
|                                      |           | <i>networks, authors may focus on comparisons versus a particular comparator (e.g. placebo or standard care), with full findings presented in an appendix. League tables and forest plots may be considered to summarize pairwise comparisons. If additional summary measures were explored (such as treatment rankings), these should also be presented.</i>                                                                  |                           |
| <b>Exploration for inconsistency</b> | <b>S5</b> | Describe results from investigations of inconsistency. This may include such information as measures of model fit to compare consistency and inconsistency models, <i>P</i> values from statistical tests, or summary of inconsistency estimates from different parts of the treatment network.                                                                                                                                | <b>10, Appendix 8-9</b>   |
| Risk of bias across studies          | 22        | Present results of any assessment of risk of bias across studies for the evidence base being studied.                                                                                                                                                                                                                                                                                                                          | <b>10-11, Appendix 10</b> |
| Results of additional analyses       | 23        | Give results of additional analyses, if done (e.g., sensitivity or subgroup analyses, meta-regression analyses, <i>alternative network geometries studied, alternative choice of prior distributions for Bayesian analyses</i> , and so forth).                                                                                                                                                                                | <b>9-10, Appendix 5-7</b> |
| <b>DISCUSSION</b>                    |           |                                                                                                                                                                                                                                                                                                                                                                                                                                |                           |
| Summary of evidence                  | 24        | Summarize the main findings, including the strength of evidence for each main outcome; consider their relevance to key groups (e.g., healthcare providers, users, and policy-makers).                                                                                                                                                                                                                                          | <b>14-15</b>              |
| Limitations                          | 25        | Discuss limitations at study and outcome level (e.g., risk of bias), and at review level (e.g., incomplete retrieval of identified research, reporting bias). <i>Comment on the validity of the assumptions, such as transitivity and consistency. Comment on any concerns regarding network geometry (e.g., avoidance of certain comparisons).</i>                                                                            | <b>16</b>                 |
| Conclusions                          | 26        | Provide a general interpretation of the results in the context of other evidence, and implications for future research.                                                                                                                                                                                                                                                                                                        | <b>16-17</b>              |
| <b>FUNDING</b>                       |           |                                                                                                                                                                                                                                                                                                                                                                                                                                |                           |
| Funding                              | 27        | Describe sources of funding for the systematic review and other support (e.g., supply of data); role of funders for the systematic review. This should also include information regarding whether funding has been received from manufacturers of treatments in the network and/or whether some of the authors are content experts with professional conflicts of interest that could affect use of treatments in the network. | <b>17</b>                 |
